## **Airborne infection risk in venues with different ventilation strategies – a comparison between experimental, numerical and analytical approaches**

S. Mareike Geisler<sup>a†\*</sup> and Kevin Lausch<sup>b†</sup>, Felix Hehnen<sup>c,d</sup>, Isabell Schulz<sup>c,d</sup>, Ulrich Kertzsch<sup>c,d</sup>, Martin Kriegel<sup>b</sup>, Christian Oliver Paschereit<sup>e</sup>, Sebastian Schimek<sup>e</sup>, Ümit Hasirci<sup>c</sup>, Gerrid Brockmann<sup>b</sup>, Annette Moter<sup>f</sup>, Karolin Senftleben<sup>a</sup> and Stefan Moritz<sup>a</sup>

<sup>a</sup>Section of Clinical Infectious Diseases, University Hospital Halle (Saale), Ernst-Grube Str. 40, 06120 Halle (Saale), Germany

<sup>b</sup>Institute of Energy Technology, Department Energy, Comfort and Health in Buildings, Technical University of Berlin, Marchstraße 4, 10587 Berlin, Germany

<sup>c</sup>Biofluid Mechanics Laboratory, Institute of Computer-assisted Cardiovascular Medicine, Deutsches Herzzentrum der Charité, Augustenburger Platz 1, 13353 Berlin, Germany

<sup>d</sup>Charité – Universitätsmedizin Berlin, corporate member of Freie Universität Berlin and Humboldt-Universität zu Berlin, Charitéplatz 1, 10117 Berlin, Germany

<sup>e</sup>Institute of Fluid Dynamics and Technical Acoustics, Hermann-Föttinger-Institute, Chair of Fluid Dynamics, Technical University of Berlin, Müller-Breslau-Str. 8, 10623 Berlin, Germany

<sup>f</sup>Charité – Universitätsmedizin Berlin, Institute of Microbiology, Infectious Diseases and Immunology, Hindenburgdamm 30, 12203 Berlin, Germany

†These authors contributed equally to this work and share first authorship.

\*Correspondence address: University Hospital Halle (Saale)  
Section of Clinical Infectious Diseases  
S. Mareike Geisler  
Ernst-Grube-Str. 40  
06120 Halle (Saale)  
Germany  
Phone: +49 345 557 5939 or +49 176 21644413  
Email:mareike.geisler@uk-halle.de

## 1 **Abstract**

2 The COVID-19 pandemic demonstrated that reliable risk assessment of venues is still challenging and  
3 resulted in the indiscriminate closure of many venues worldwide. Therefore, this study used an  
4 experimental, numerical and analytical approach to investigate the airborne transmission risk potential  
5 of differently ventilated, sized and shaped venues. The data were used to assess the effect size of  
6 different mitigation measures and to develop recommendations.

7 In general, positions in the near field of an emission source were at high risk in all ventilation systems  
8 studied, while the risk of infection from positions in the far field varied depending on the ventilation  
9 strategy. Occupancy rate, airflow rate, residence time, SARS-CoV-2 virus variants, a high activity level  
10 and face masks affected the individual and total infection risk in all venues. The total infection risk was  
11 lowest for the displacement ventilation case and highest for the naturally ventilated venue. Therefore,  
12 in our study, a properly designed displacement ventilation system is the most effective ventilation  
13 strategy to keep airborne transmission and the number of secondary cases low, compared to mixing or  
14 natural ventilation.

## 15 **Introduction**

16 The severe acute respiratory syndrome coronavirus type 2 (SARS-CoV-2) is the causative agent of  
17 the coronavirus disease 2019 (COVID-19) and is transmitted primarily by infectious respiratory  
18 droplets and aerosols and less frequently through direct contact or fomites<sup>1-2</sup>. During the COVID-19  
19 pandemic, venues around the world were closed to contain the spread of SARS-CoV-2<sup>3</sup>. Both large-  
20 and small-scale events were assumed to increase the risk of virus transmission and thus amplifying  
21 the burden of the pandemic. In fact, there are many reports of transmission events in confined and  
22 poorly ventilated indoor spaces, partly due to airborne aerosols<sup>4-5</sup>. However, recent studies have  
23 shown that the event-related risk of contracting SARS-CoV-2 was low with a well-functioning  
24 ventilation system and an appropriate hygiene concept<sup>6-9</sup>.

25 Ventilation strategies in venues are very heterogeneous and include a variety of displacement (DV),  
26 mixing (MV) and natural (NV) ventilation concepts. The room-specific airflow and consequently the  
27 accumulation of airborne pathogens is strongly influenced by the ventilation strategy due to  
28 differences in the way of air supply and exhaust<sup>10-11</sup>. In DV systems, conditioned air is supplied at low  
29 velocity above the floor directly to the occupied zone, rises due to buoyancy effects and is exhausted  
30 at the ceiling. MV systems introduce air at high velocity from the ceiling or side wall outside the  
31 occupied zone, to mix with the indoor air, and thus dilute contaminants, and then exhausted. Unlike  
32 mechanically ventilated rooms, NV systems use only natural forces such as wind or buoyancy effects  
33 to create air movement and to supply fresh air. There are a lot of studies, which reported that DV  
34 systems are considered to have a lower risk of airborne disease transmission than MV or NV systems  
35 due to the higher ventilation effectiveness and index<sup>10,12-17</sup>. Other authors, however, have reported  
36 contradictory results<sup>18-19</sup>, but highlighted the need for a sufficient ventilation rate of  $\geq 3$  air changes per  
37 hour (ACH) to effectively reduce the risk of infection with DV<sup>19-20</sup>. Venues are usually complex spaces  
38 with multiple areas that require special ventilation concepts to ensure good air quality and a low risk of  
39 infection throughout the venue. In the past, however, mechanical ventilation systems of venues was

40 given a low priority in the prevention of airborne diseases, as the focus was primarily on the  
41 requirements for quiet operation, thermal comfort and economical energy consumption<sup>21-25</sup>. Although  
42 venue studies on the risk of airborne disease transmission have increased since the COVID-19  
43 pandemic, a comprehensive risk assessment comparing and classifying different ventilation concepts  
44 with regard to their risk of transmitting infectious aerosols is still lacking. The only large-scale  
45 monitoring study was conducted as part of the Events Research Programme (ERP) of the UK  
46 Government, analysing the ventilation effectiveness in up to 10 differently sized and ventilated  
47 theatres during 90 regular events with spectators using CO<sub>2</sub> sensors<sup>26-27</sup>. The authors of the study  
48 identified poorly ventilated areas despite adequate ventilation rates. However, the lack of controlled  
49 study conditions, as well as the general inability of CO<sub>2</sub> approaches to account for the effectiveness of  
50 face masks, air purifiers and the infectivity of individuals, e.g. high emitters, indicated that further  
51 research is needed<sup>28</sup>. Few studies examined SARS-CoV-2 transmission via aerosols in single venues  
52 using analytical<sup>29-30</sup>, computational fluid dynamic (CFD)<sup>6</sup> or experimental models<sup>31-32</sup>. The analytical  
53 approach, such as the Wells-Riley or dose-response approach, assumes, i.a., that aerosols are  
54 instantaneously and uniformly distributed in space<sup>33</sup>. Consequently, the spatio-temporal distribution of  
55 aerosols is neglected, resulting in the same risk of infection for every person in the room, regardless of  
56 their position. CFD analysis can overcome this problem by simulating and visualising venue-specific  
57 aerosol distribution patterns, thus enabling the calculation of individual infection risks, as recently done  
58 by several published CFD based studies<sup>11,34-36</sup>. Limitations of this approach are the simplified  
59 assumptions of stationary airflow patterns, boundary conditions and ideal airborne particles. Therefore,  
60 experimental measurements are needed for the validation of the numerical data and vice versa.  
61 Current methodologies use optical systems, CO<sub>2</sub>, tracer gas, artificial aerosols or virus surrogates to  
62 investigate infectious aerosol distribution in venues<sup>26,31-32,37-40</sup>. However, direct, fast and easy  
63 measurement of sputum-like aerosol particles in the immediate vicinity of the emission source and at  
64 various far-field positions in everyday environments has proven difficult. The Aerosol Transmission  
65 Measurement System (ATMoS) fills the gap, as it can easily quantify aerosol and droplet transmission  
66 between dummies in real time and with high resolution at different environmental positions, even over  
67 large distances<sup>41</sup>. ATMoS enables room aerosol distribution and exposure measurements making it  
68 suitable for the assessment of various indoor scenarios like different ventilation settings and mitigation  
69 strategies<sup>42</sup>.

70 To the best of our knowledge, this is the first large-scale approach that has used a combination of  
71 experimental, numerical and analytical investigations to assess the airborne transmission risk potential  
72 of venues with different ventilation strategies. Therefore, ATMoS and CFD analyses were used to  
73 assess the airborne transmission risk experimentally and numerically in venues with displacement  
74 ventilation (DVV), mixing ventilation (MVV) or natural ventilation (NVV). For this purpose, different  
75 emission positions and modes as well as boundary conditions (e.g. occupancy, air flow rate) were  
76 taken into account for the risk analyses. The experimentally and numerically derived venue-specific  
77 infection risk was then compared with the classical analytically Wells-Riley approach<sup>30</sup>. In addition, the  
78 effects of mitigation measures and varying boundary conditions on the risk of infection were  
79 investigated by CFD. The experimental measurement setup and the venue-specific data on aerosol  
80 amounts are presented in Schulz & Hehnen et al.<sup>42</sup>, while the focus of this manuscript is on the

81 calculation of venue-specific infection risks. Consequently, the results were used to identify critical  
82 areas and conduct a ventilation-specific risk assessment, followed by a set of venue- and ventilation-  
83 specific recommendations to ensure safe events in future.

## 84 **Results**

### 85 **Spatial distribution of individual infection risks in different ventilated venues using CFD** 86 **analyses**

87 In general, there was a good agreement between ATMoS and CFD derived ppm values for DVV1 and  
88 NVV, but worse for MVV1<sup>42</sup>. Using the concentration of infectious quanta of each occupants breathing  
89 zone, the venue-specific individual and total risk of infection  $P_{CFD}$  and  $R_{CFD}$  could be calculated for  
90 different settings and emitter positions.

#### 91 *Infection risk for a sedentary, passive emitter*

92 For DVV1, MVV1 and NVV the exact locations and number of highly exposed positions varied with the  
93 position of the emitter. The CFD simulation of DVV1 with an ascending spectator area showed a  
94 directional aerosol distribution with a pronounced aerosol plume behind the emitter for the  
95 configuration E6 and B9 (Figure 1A 2+3, Fig. S3A). To this effect, the seats behind the emitter were  
96 the most exposed, even with increasing distance, while the positions in front of and next to the emitter  
97 remained almost unaffected reflected in low individual infection risks ( $P_{CFD}$ ). The number of people  
98 exceeding the acceptable risk  $R_{acc}$  threshold of  $10^{-2}$  ranged from 0 (0%) to 11 (11%) for the different  
99 emitter positions. For MVV1, a preferential but less directional flow of aerosol particles backwards  
100 towards the upper right corner was identified (Figure 1B1-3, Fig. S3B). Positions with increased  $P_{CFD}$   
101 were located in all directions around the emitter and resulted in 5 (5%) to 10 (10%) spectators  
102 reaching  $R_{acc}$  above  $10^{-2}$  in the near- and far-field of the emitter. NVV with an ascending spectator  
103 area showed a directional aerosol distribution with a pronounced aerosol plume behind the emitter,  
104 especially for the emitter position A14 (Figure 1C2 + Fig. S3D), similar to DVV1. Seats behind the  
105 emitter had the highest  $P_{CFD}$  values, even with increasing distance, but unlike DVV1, the emission of  
106 aerosol particles resulted in contamination of the entire venue resulting in 22 (9%) to 170 (70%)  
107 spectators exceeding  $R_{acc}$  above  $10^{-2}$ .

108 The numerically derived risk of airborne transmission  $R_{CFD}$ , corresponding to the number of new  
109 COVID-19 infections, also referred to as secondary cases, varied depending on the position of the  
110 emitter and the ventilation strategy. DVV1 showed the lowest  $R_{CFD}$  values compared to MVV1 and  
111 NVV ranging from 0.00 (H5) to 0.26 (B9) (Figure 1A1-3). For MVV1, the number of new COVID-19  
112 cases was slightly higher, ranging from 0.29 to 0.41 (Figure 1B1-3).  $R_{CFD}$  for NVV was about 2 to 2.6  
113 (Figure 1C1-3).

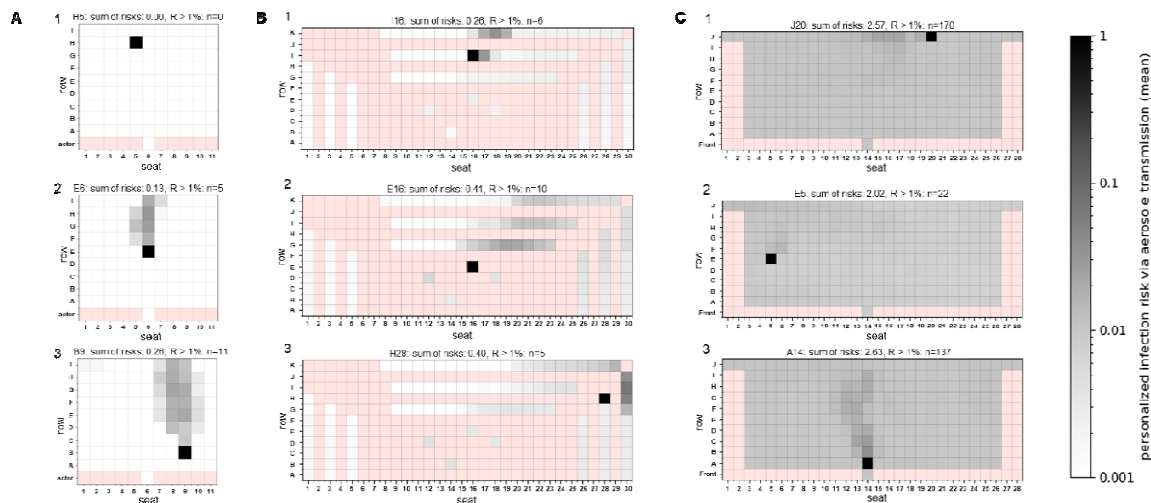

114

115 **Figure 1: Distribution of the numerical derived individual ( $P_{CFD}$ ) and total risk of infection ( $R_{CFD}$ ) for the**  
 116 **venues DVV1, MVV1 and NVV considering a sedentary, passive emitter**

117 Infection risk plots for the venues with displacement ventilation (A), mixing ventilation (B) and natural  
 118 ventilation (C) are shown. (A) At DVV1, the emitter was located at H5 (1), E6 (2) and B9 (3). (B) MVV  
 119 emitter positions were at I16 (1), E16 (2) and H28 (3). (C) The positions of the NVV emitters were at  
 120 J20 (1), A14 (2) and E5 (3). The individual risk of infection is plotted for each position, except for the  
 121 red positions, as these do not represent seats in the audience. The sum of risks for each venue and  
 122 emitter positions as well as the number of spectators with  $R > 1\%$  are indicated above the plots.

123 *Infection risk for a high emitter (90<sup>th</sup> percentile)*

124 In the case of a high emitter, the distribution of aerosol particles and  $P_{CFD}$  was similar and dependent  
 125 on the position of the emitter as for a medium emitter for all ventilation strategies studied (Figure 2).  
 126 The zone of increased risk was much more pronounced and wider for the DVV1 and NVV cases. In  
 127 general, an enhanced release of infectious aerosol was associated with an increase in individual and  
 128 total infection risk at all venues. For DVV1, the number of spectators above  $R_{acc}$  remained unchanged  
 129 for H5 but increased by 2.4 to 2.9-times for E6 and B9, representing 12% to 32% of spectators (Figure  
 130 2A1-3). At MVV1 and NVV, a high emitter resulted in the distribution of aerosol particles throughout  
 131 the venue. This was associated with increased  $P_{CFD}$  values at all positions, as demonstrated by almost  
 132 100% of spectators achieving  $R_{acc}$  above 1% (Figure 2B+C 1-3).

133  $R_{CFD}$  increased by a factor of about 13 to 14 for all emitter positions at all venues (Figure 2A-C). For  
 134 DVV1 the number of secondary infections was highest for B9 with 3.67 and lowest for H5 with 0.02.  
 135  $R_{CFD}$  ranged from 3.88 to 5.75 for MVV1 and 28.46 to 36.79 for NVV.

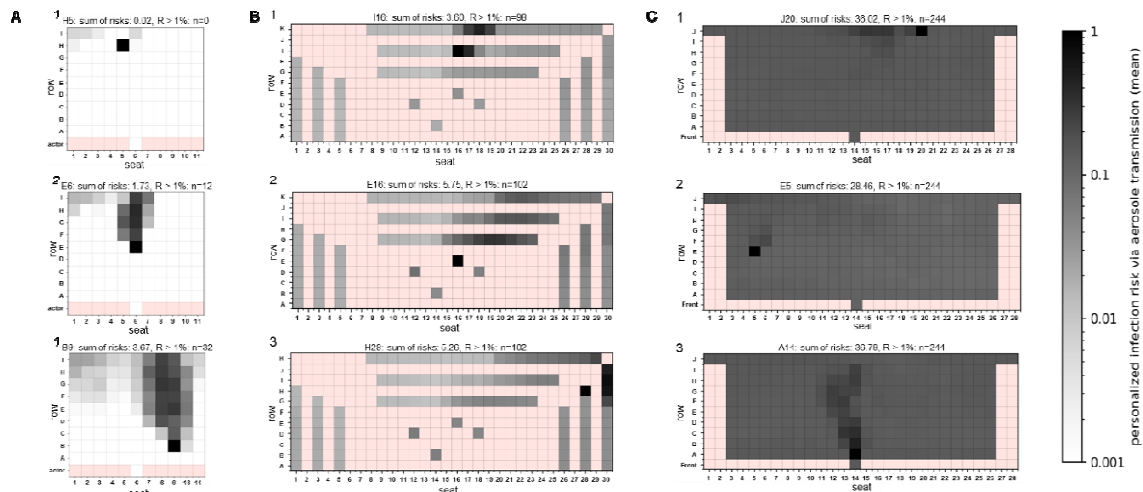

136

137 **Figure 2: Distribution of the numerical derived individual ( $P_{CFD}$ ) and total risk of infection ( $R_{CFD}$ ) for the**  
 138 **venues DVV1, MVV1 and NVV considering an high emitting individual (90<sup>th</sup> percentile)**

139 Infection risk plots for the venue with displacement ventilation (A), mixing ventilation (B) and natural  
 140 ventilation (C) are shown, considering a high emitter. (A) At DVV1, the emitter was located at H5 (1),  
 141 E6 (2) and B9 (3). (B) MVV emitter positions were at I15 (1), E16 (2) and H28 (3). (C) The positions of  
 142 the NVV emitters were at J20 (1), A14 (2) and E5 (3). The individual risk of infection is plotted for each  
 143 position, except for the red positions, as these do not represent seats in the audience. The sum of  
 144 risks for each venue and emitter position as well as the number of spectators with  $R > 1\%$  are  
 145 indicated above the plots.

146 **Comparison of the experimental ( $R_{ATMOS}$ ), numerical ( $R_{CFD}$ ) and analytical ( $R_{analyt}$ ) derived risk of**  
 147 **infection for different ventilated venues**

148 The analytical risk of infection  $R_{analyt}$  was calculated for all venues and both emission modes according  
 149 to Peng et al.<sup>30</sup> and was compared with  $R_{ATMOS}$  and  $R_{CFD}$  (Table 1). Considering a medium and high  
 150 emitter at DVV1,  $R_{ATMOS}$  and  $R_{CFD}$  showed good agreement in 3 out of 4 emitter positions with slight  
 151 differences, but both were lower than  $R_{analyt}$ . MVV1 showed comparable values for  $R_{ATMOS}$ ,  $R_{CFD}$  and  
 152  $R_{analyt}$ . For the NVV position A14, the values for  $R_{ATMOS}$ ,  $R_{CFD}$  and  $R_{analyt}$  were heterogeneous, with the  
 153 lowest value for  $R_{analyt}$  for medium and high quanta emission rates. A high emitter led to an overall  
 154 ~14-fold increase at all venues and emitter positions for  $R_{ATMOS}$ ,  $R_{CFD}$  and  $R_{analyt}$ .

155

156

157

158

159

160

161

162

163 **Table 1: Comparison of the experimentally ( $R_{ATMoS}$ ), numerically ( $R_{CFD}$ ) and analytically ( $R_{analyt}$ ) derived**  
 164 **total risk of infection**

165 The emitter positions investigated were B9, E6 and H5 in DVV1, E16, H28 and I16 in MVV1 and A14,  
 166 E5 and J20 in NVV for a silent, sedentary, and high emitter. To obtain  $R_{ATMoS}$ , the mean value of the  
 167 seven absorber-specific  $P_{ATMoS}$  values of one measurement was calculated and multiplied by the total  
 168 number of spectators.  $R_{CFD}$  represents the sum of the individual infection risks  $P_{CFD}$ .  $R_{analyt}$  was  
 169 calculated according to Peng et al.<sup>30</sup> The total risk of infection coincides with the number of new  
 170 COVID-19 infections and refers to as secondary infections.

| venue | emitter position | sedentary, passive |           |              | high emitter |           |              |
|-------|------------------|--------------------|-----------|--------------|--------------|-----------|--------------|
|       |                  | $R_{ATMoS}$        | $R_{CFD}$ | $R_{analyt}$ | $R_{ATMoS}$  | $R_{CFD}$ | $R_{analyt}$ |
| DVV1  | B9               | 0.14               | 0.26      | 0.35         | 1.91         | 3.67      | 5.03         |
|       | E2               | 0.14               | 0.12      |              | 1.87         | 1.70      |              |
|       | E6               | 0.19               | 0.13      |              | 2.59         | 1.73      |              |
|       | H5               | 0.04               | 0.00      |              | 0.55         | 0.02      |              |
| MVV1  | E16              | 0.33               | 0.41      | 0.35         | 4.57         | 5.75      | 4.88         |
|       | H28              | 0.27               | 0.40      |              | 3.76         | 5.26      |              |
|       | I16              | 0.23               | 0.26      |              | 3.27         | 3.60      |              |
| NVV   | A14              | 1.48               | 2.63      | 0.79         | 20.01        | 36.79     | 11.27        |
|       | E5               | -                  | 2.02      |              | -            | 28.46     |              |
|       | J20              | -                  | 2.57      |              | -            | 36.02     |              |

171

172 **Risk evaluation of venues regarding different activity levels, variants of concern and mitigation**  
 173 **strategies**

174 The CFD results were used to study the effects of different parameters on the number of COVID-19  
 175 secondary cases  $R_{CFD}$  compared to  $R_{analyt}$  (Table 2). The reference case represented a 2h event with  
 176 full occupancy and airflow considering the wild-type SARS-CoV2 virus variant and no use of face  
 177 coverings. Increased activity such as singing or shouting significantly increased  $R_{CFD}$  by a factor of  
 178 14.4 to 19.3 at all venues compared to a silent, passive emitter. The use of surgical masks reduced  
 179  $R_{CFD}$  values by a factor of ~2 to 3 at all venues for both emission profiles. As a result, the number of  
 180 new COVID-19 cases for a singing or shouting emitter decreased from up to 4.4 to 2.0 for DVV1, 7.9  
 181 to 3.4 for MVV1 and 43.7 to 20.5 for NVV but were still about eight times higher than for a silent,  
 182 passive, non-masked emitter. The use of FFP2 masks reduced the  $R_{CFD}$  values obtained with surgical  
 183 masks by a factor of 7 to 10. Reducing the event duration to 1h decreased the number of secondary  
 184 infections by ~2 times, but still showed  $R_{CFD} > 1$  for NVV. In contrast, increasing the residence time to  
 185 3h resulted in 1.5-fold higher number of new COVID-19 cases. While  $R_{CFD}$  for DVV1 and MVV1  
 186 remained  $< 1$ , NVV showed  $R_{CFD}$  values of 3 to 3.8.

187 Considering the variants of concern (VOC), the number of secondary infections increased 1.5, 2 or 3  
 188 times for Alpha, Delta or Omicron. In the case of DVV1,  $R_{CFD}$  remained below 1 for all three variants



189 considered. For MVV1,  $R_{CFD} < 1$  was observed for the variants Alpha and Delta, while Omicron  
 190 resulted in  $R_{CFD}$  values of 1.04 to 1.25. Considering NVV, a silent and resting emitter infected with the  
 191 Omicron variant resulted in 6.13 to 7.8 secondary infections.

192 The effect of reducing the airflow rate was investigated for DVV1 using CFD analysis, resulting in an  
 193 increase of 1.7 to 2.3 in airborne infection risk as also seen for  $R_{analyt}$ .

194 **Table 2: Influence of different parameters and mitigation strategies on the total risk of infection  $R_{CFD}$  of**  
 195 **venues with different ventilation concepts**

196 The parameter study was performed for different parameters, mitigation strategies, activity levels and  
 197 emitter positions for the venues DVV1, MVV1 and NVV for the case of a single silent, sedentary  
 198 emitter (reference).  $R_{CFD}$  represents the sum of the individual infection risks  $P_{CFD}$  and was calculated  
 199 for each emitter position of each setting. The  $R_{CFD}$  value is a measure of the number of secondary  
 200 infections. The reference settings (black) were as follows: no face masks, event duration of 2h, SARS-  
 201 CoV-2 wild-type variant and full occupancy. The efficacy of masks was investigated using surgical  
 202 masks (65% (0.35) filtration efficiency) and well-fitting FFP2 masks (99.96% filtration efficiency (0.04)).  
 203  $R_{CFD}$  values were highlighted according to their risk potential using a colour-coded scale with: high risk  
 204 -  $R_{CFD} \geq 1$  red, medium risk -  $R_{CFD} = 0.5$ , low risk -  $R_{CFD} = 0$ . Shades of yellow-orange-red and yellow-  
 205 green indicate values between the thresholds.  $R_{analyt}$  values (dark grey) were calculated according to  
 206 Peng et al. (2022). Empty boxes indicate the absence of numerical measurements for a given  
 207 configuration.

| venue | setting<br>position | no face coverings<br>2h             |                     | surgical mask (65%)<br>2h |                     | FFP2 mask (99.96%)<br>2h |                     | time |      | SARS-CoV-2 variant<br>2h |       |         | 50%<br>airflow rate<br>2h | 50%<br>occupancy<br>2h |
|-------|---------------------|-------------------------------------|---------------------|---------------------------|---------------------|--------------------------|---------------------|------|------|--------------------------|-------|---------|---------------------------|------------------------|
|       |                     | silent,<br>sedentary<br>(reference) | singing<br>standing | silent<br>sedentary       | singing<br>standing | silent<br>sedentary      | singing<br>standing | 1h   | 3h   | Alpha                    | Delta | Omicron |                           |                        |
|       |                     |                                     |                     |                           |                     |                          |                     |      |      |                          |       |         |                           |                        |
| DVV1  | R8                  | 0.28                                | 4.38                | 0.10                      | 2.03                | 0.01                     | 0.31                | 0.14 | 0.39 | 0.39                     | 0.50  | 0.78    | 0.81                      | 0.09                   |
|       | R2                  | 0.12                                | 1.93                | 0.06                      | 0.92                | 0.01                     | 0.16                | 0.06 | 0.18 | 0.18                     | 0.23  | 0.36    | 0.31                      | 0.04                   |
|       | R6                  | 0.13                                | 1.87                | 0.05                      | 0.91                | 0.01                     | 0.16                | 0.07 | 0.18 | 0.18                     | 0.24  | 0.37    | 0.22                      | 0.05                   |
|       | R4                  | 0.00                                | 0.00                | 0.00                      | 0.02                | 0.00                     | 0.00                | 0.00 | 0.00 | 0.00                     | 0.00  | 0.01    | 0.05                      | 0.00                   |
|       | R4er                | 0.07                                | 1.85                | 0.03                      | 0.71                | 0.00                     | 0.09                | 0.04 | 0.11 | 0.11                     | 0.14  | 0.23    | 0.69                      | 0.02                   |
|       | $R_{analyt}$        | 0.35                                | 10.62               | 0.12                      | 3.72                | 0.01                     | 0.43                | 0.17 | 0.55 | 0.53                     | 0.71  | 1.17    | 0.67                      | 0.18                   |
| MVV1  | R15                 | 0.41                                | 7.95                | 0.15                      | 3.44                | 0.07                     | 0.49                | 0.21 | 0.60 | 0.60                     | 0.79  | 1.25    | -                         | 0.33                   |
|       | R20                 | 0.40                                | 6.72                | 0.15                      | 3.03                | 0.02                     | 0.47                | 0.21 | 0.58 | 0.58                     | 0.75  | 1.16    | -                         | 0.32                   |
|       | R18                 | 0.26                                | 5.14                | 0.09                      | 2.19                | 0.01                     | 0.31                | 0.13 | 0.38 | 0.54                     | 0.69  | 1.04    | -                         | 0.50                   |
|       | $R_{analyt}$        | 0.35                                | 10.38               | 0.12                      | 3.60                | 0.01                     | 0.41                | 0.17 | 0.52 | 0.52                     | 0.69  | 1.14    | 0.66                      | 0.17                   |
| NVV   | A14                 | 2.53                                | 43.65               | 0.96                      | 20.32               | 0.11                     | 3.12                | 1.36 | 3.04 | 3.04                     | 5.81  | 7.04    | -                         | -                      |
|       | B3                  | 2.52                                | 36.37               | 0.73                      | 16.51               | 0.08                     | 2.40                | 1.03 | 2.97 | 2.97                     | 3.88  | 6.13    | -                         | -                      |
|       | L10                 | 2.57                                | 43.15               | 0.93                      | 20.20               | 0.11                     | 3.08                | 1.32 | 3.76 | 3.76                     | 4.90  | 7.64    | -                         | -                      |
|       | $R_{analyt}$        | 0.79                                | 23.77               | 0.28                      | 8.32                | 0.03                     | 0.96                | 0.21 | 1.71 | 1.20                     | 1.60  | 2.63    | 0.81                      | 0.10                   |

208

209 **Special cases**

210 *Venue with displacement ventilation in the stalls and non-mechanically ventilated balconies (DVV2)*

211 DVV2 contains displacement-ventilated stalls and two naturally ventilated balconies. Numerical (Figure  
 212 3, Fig. S3C) and experimental (Fig. S4) measurements observed a pronounced aerosol plume with  
 213 increased exposure behind the emitter for the position R8S21. Spectators in front of and next to the  
 214 emitter remained almost unaffected and showed low individual infection risks (Figure 3, Fig. S4). A  
 215 silent, sedentary emitter placed in the stalls spreaded infectious aerosols up to the balconies. On the  
 216 contrary, aerosol emissions emanating from the balconies remained their without exposing the stalls  
 217 but showed a 2.7 times higher risk of infection compared to the stalls (Figure 3A+B, Fig. S3C).

218 In the case of a high emitter, the aerosol partially dispersed over the entire balcony and led to a  
 219 significant 14.3-fold increase in the airborne infection risk  $R_{CFD}$  and  $R_{ATM05}$  (Figure 3A+B3, Fig. S4).



### A sedentary, passive emitter

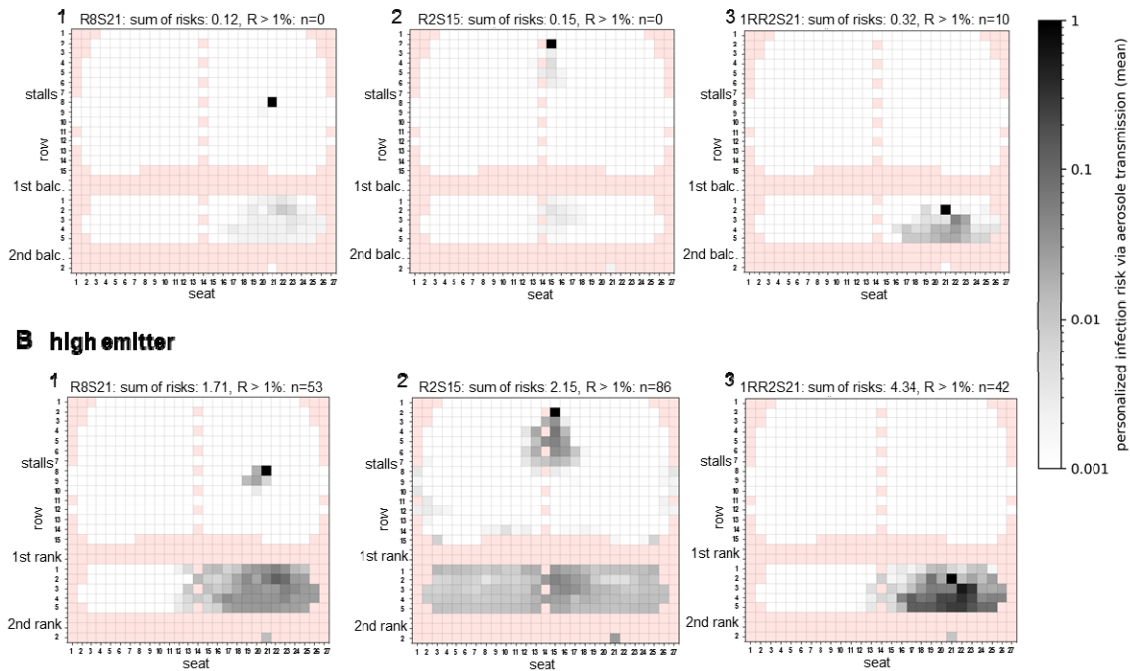

220

221 **Figure 3: Distribution of the numerical derived individual and total risk of infection for the venue DVV2**  
 222 **with displacement ventilation in the stalls and unventilated balconies**

223 (A, B) Numerically derived infection risk plots for the emitter positions R8S21(1), R2S15 (2) and  
 224 1RR2S21 (3) for the silent passive emitter (A) and the high emitter case (90<sup>th</sup> percentile; B) are shown.  
 225 The individual risk of infection is plotted for each seat, except for the red shaded positions, as these do  
 226 not represent seats in the audience. The sum of risk for each venue and emitter position as well as the  
 227 number of spectators with  $R > 1\%$  are indicated above the plots. The positions of the stalls, 1<sup>st</sup> balcony  
 228 and 2<sup>nd</sup> balcony are indicated in the graphs. balc. = balcony

### 229 Infectious actor

230 In a special configuration, we placed the emitter on stage to experimentally simulate an infectious  
 231 actor (Figure 4A1). The aerosol that emanated from the infectious actor did not show a directional  
 232 distribution with a pronounced aerosol plume, as seen for the emitter position B9 (Figure 4A2). A  
 233 silent, passive actor contributed to low individual infection risks and a low  $R_{CFD}$  value of 0.07, which is  
 234 3.7 times lower compared to emitter position B9 (Figure 4A1-2). An increased emission and activity  
 235 rate by a high emitting actor resulted in the exposure of the entire venue, resulting in 1.02 secondary  
 236 infections and 44 spectators exceeding the critical threshold  $R_{acc}$  (Figure 4A3). In contrast, at emitter  
 237 position B9, mainly spectators behind the emitter were exposed to infectious aerosols, resulting in 3.6-  
 238 times more secondary infections than in the case of the infectious actor, but showed a lower number  
 239 of people above  $R_{acc}$  (Figure 4A4).

### 240 Variations of boundary conditions

#### 241 Reduced airflow rate

242 Numerical simulations were performed for DVV1 with a 50% reduced airflow rate (Figure 4B). The  
 243 pronounced aerosol plume was still observed for emitter position B9, but infectious aerosols were  
 244 additionally dispersed throughout the venue, resulting in a doubling of spectators exceeding the  $R_{acc}$   
 245 threshold of 1% and a 2.3-fold increase in secondary infections to 0.61 (Figure 4B2). A silent, passive

246 actor resulted in almost uniform exposure of the entire venue, increasing the total risk of infection by  
 247 9.9-fold to 0.69 (Figure 4B1). A high emitting spectator (B9) or actor, combined with a 50% reduction  
 248 in airflow rate, caused high exposure of the entire venue to infectious aerosols, with almost 100% of  
 249 spectators exceeding the  $R_{acc}$  threshold of  $10^{-2}$  and 8.36 or 9.68 new COVID-19 cases, respectively,  
 250 representing 8-10% of the total audience (Figure 4B3-4). The high-risk setting with a high emitter in a  
 251 poorly ventilated venue increased the total risk of infection by 32 (B9) and 138 (actor) times,  
 252 respectively, compared with the low-risk setting with a silent, passive emitter in a well-ventilated  
 253 venue.

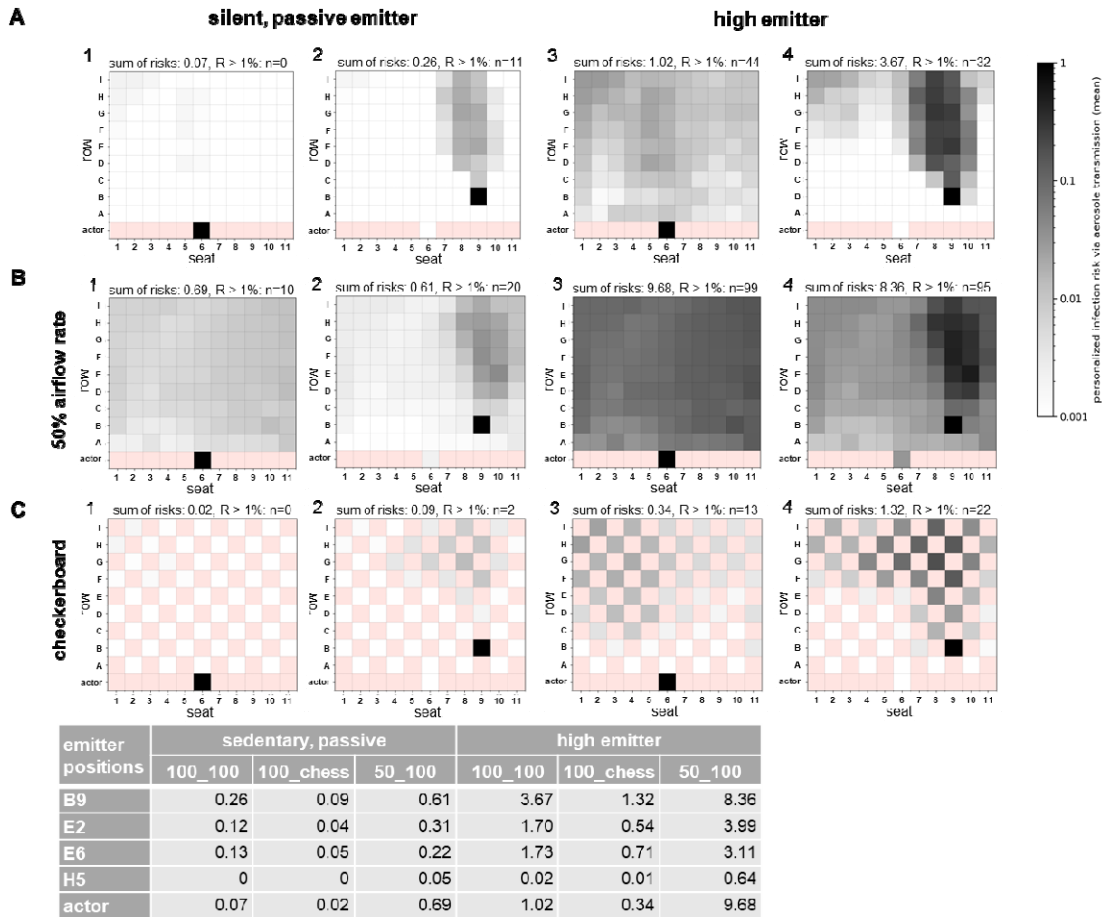

254

255 **Figure 4: Influence of the emitter stage position (actor), 50% reduced air flow rate and checkerboard**  
 256 **pattern seating arrangement on individual ( $P_{CFD}$ ) and total risk of infection ( $R_{CFD}$ ) at DVV1**

257 Infection risk plots for the stage (actor) compared to the audience emitter position B9 for the silent  
 258 passive emitter (1-2) and the high emitter (90<sup>th</sup> percentile; 3-4) are shown: (A) standard conditions with  
 259 full air flow rate (4500 m<sup>3</sup>/h) and occupancy rate (99 spectators) indicated as 100\_100, (B) 50%  
 260 reduced air flow rate indicated as 50\_100 and (C) checkerboard seating arrangement indicated as  
 261 100\_chess. The individual risk of infection is plotted for each position, except for the red positions as  
 262 these do not represent seats in the audience. The sum of risk for each venue and emitter position as  
 263 well as the number of spectators with  $R > 1\%$  are indicated above the plots and are summarised in the  
 264 table.

265

266

267 Checkerboard pattern seating

268 The effect of a 50% reduction in occupancy with checkerboard seating was investigated in venues with  
269 displacement (DVV1) and mixing ventilation (MVV1, MVV2) using ATMoS and CFD analyses (Figure  
270 4C, Table 2, Fig. S5-Fig. S8). For DVV1 emitter position B9, the checkerboard pattern seating caused  
271 a broadening of the zone of elevated risk, but otherwise showed a qualitatively similar distribution of  
272 individual infection risks  $P_{CFD}$  for all emitter positions and emission profiles compared with the full  
273 seating arrangement (Fig. 4C, Fig. S5).  $R_{CFD}$  values of emitter positions investigated in DVV1 were  
274 reduced by a factor of 2.6 to 3.5 with checkerboard seating. For MVV1, halving the occupancy rate  
275 showed numerically and experimentally a similar distribution of individual infection risks  $P_{CFD}$  and  
276  $P_{ATMoS}$  (Fig. S6, Fig. S7), but resulted in a different propagation risk pattern for MVV2 compared to full  
277 occupancy (Fig. S8).  $R_{CFD}$  and  $R_{ATMoS}$  values resulted in a decreasing effect of 1.2 to 2 times for MVV1  
278 (Fig. S6, Fig. S7) and 1.3 to 4.5 times for MVV2 (Fig. S7). However, for MVV1 emitter position I16, the  
279  $R_{CFD}$  values almost doubled with the checkerboard seating arrangement (Fig. S6).

## 280 Discussion

281 The COVID-19 pandemic has demonstrated that an appropriate risk assessment is needed to avoid  
282 the general and undifferentiated closure of venues in future. To address this shortcoming, venues with  
283 different ventilation strategies have been studied experimentally, numerically and analytically in terms  
284 of aerosol distribution and exposure to calculate venue-specific infection probabilities and risks  
285 compared to the classical analytical approach.

286 In our study, venues with displacement ventilation and an ascending spectator area posed a low risk  
287 of infection under an average emitter scenario with 18.6 quanta  $h^{-1}$  (medium emitter scenario),  
288 indicated by low individual transmission risks for most spectators and R values well below one.  
289 However, the observed pronounced aerosol plume was associated with highly exposed positions in  
290 the near- and far-field behind the emitter, while the positions in front of and next to the emitter were  
291 almost unaffected, creating characteristic low- and high exposure areas, similar to the results of  
292 previous studies<sup>43-45</sup>. The expansion of the aerosol plume and thus the airborne transmission risk is  
293 strongly dependent on the position of an infectious person as shown recently<sup>16,44,46</sup>. The radiant wall at  
294 the back of the room is assumed to influence the airflow pattern and aerosol dispersion as recently  
295 shown<sup>46</sup>. For MVV1, the airborne transmission risk is less dependent on the position of an infectious  
296 individual, but was higher, with a similar number of people exceeding  $R_{acc}$  of  $10^{-2}$ , compared to DVV1  
297 as shown recently<sup>36,47</sup>. This indicated that infectious aerosols were dispersed throughout MV venues,  
298 creating many low- and medium risk positions and a few high-risk positions in the near- and far-field of  
299 the emitter, in contrast to DV venues, as also demonstrated for the high emitter scenario. These  
300 findings were supported by Makris, Lichtner & Kriegel<sup>43</sup>, which showed that the probability of inhaling  
301 aerosol particles at a distance of 1.5 m is twice as high and at a distance of 4 m four times as high for  
302 MV cases as for DV cases. Further, MV studies have found high infection probabilities even at longer  
303 distances<sup>11,48</sup>. However, predicting highly exposed positions is more difficult as the airflow  
304 characteristics in MVV1 are less directional and likely to be sensitive to boundary conditions, as shown  
305 by the heterogeneous effects of the checkerboard seating arrangement at MVV1 and MVV2.

306 Moreover, the influence of seasons<sup>49</sup>, air temperatures<sup>50</sup> and spectator layout<sup>51</sup> on airflow  
307 characteristics has been demonstrated in recent studies on MV, but also on DV cases.

308 In NVV, the aerosol is distributed in high concentrations throughout the venue, regardless of the  
309 position of the infectious source, resulting in the highest airborne transmission risk for each emitter  
310 position compared to DV and MV venues, as shown previously<sup>44</sup>. Similarly, recent studies have shown  
311 that the risk of airborne transmission does not necessarily decrease with distance in naturally  
312 ventilated rooms, as the highest probabilities of infection were observed at longer distances, well  
313 beyond physical distance guidelines<sup>11,48</sup>. To keep  $R < 1$  at NVV, the acceptable individual infection risk  
314  $R_{acc}$  must be reduced to 0.4%, the number of spectators to 101 (41%) or the exposure time to a  
315 maximum of ~40 min. The maximum number of spectators for a 1.5h event is 133 (55%).  
316 Nevertheless, it should be noted that well-designed NV systems are potentially suitable for infection  
317 control and provide a cost-effective ventilation approach. However, they are usually highly dependent  
318 on natural forces such as wind, open windows or doors and air temperature, and are therefore  
319 characterised by unstable and changing airflow patterns, associated with a variety of potential  
320 distributions of infection risk in a room<sup>10,12,52-54</sup>.

321 All high emission scenarios, such as the more infectious SARS-CoV-2 variants, high viral loads or  
322 increased activity, were associated with an increased airborne transmission risk. For DVV, this was  
323 due to a much more pronounced and wider zone of elevated risks compared to a medium emitter. In  
324 contrast, a high emitter in MVV1 distributed the infectious aerosols throughout the venue, resulting in a  
325 high risk of infection at any position in the venue, with almost 100% of spectators above  $R_{acc}$ ,  
326 comparable to the high emitter scenario in the poorly ventilated DVV1. A high-emitting spectator at  
327 NVV resulted in high exposure of the entire venue making NVV a high-risk site with a high potential for  
328 super-spreading events, regardless of the position of the infectious person. The maximum residence  
329 time or crowding index was significantly reduced to 3.15 min or seven spectators to keep  $R < 1$ .  
330 Combining the more infectious Omicron variant<sup>55-56</sup> with a high emitter or singing/ shouting emitter had  
331 an additional enhancing effect, resulting in secondary infection rates of 10%, 25% or 50% of the  
332 DVV1, MVV1 or NVV audiences. The high emitter case demonstrated greater resilience to different  
333 types of emissions for DVV1 compared to the mixing and natural ventilation case. This was confirmed  
334 by a study, which showed that even in high emission scenarios, DV performed better than MV  
335 systems, which spread the contaminant source over a larger part of the room<sup>57</sup>. To differentiate, high  
336 emitting individuals occur only occasionally, but given the substantial super spread potential of SARS-  
337 CoV-2, they should be emphasised in the risk assessment to avoid threatening events<sup>58-61</sup>.  
338 Furthermore, the case of singing and shouting spectators is less relevant for theatres or operas but  
339 considers spectators at concerts and sporting events as well as infectious actors.

340 FFP2 masks reduced the number of secondary cases by up to 26 times, turning DVV1 and MVV1 into  
341 minimal risk sites and reducing the airborne transmission risk of NVV below the critical threshold for  
342 pandemic control of one. Similarly, recent studies demonstrated the risk-reducing effect of face masks  
343 on COVID-19 transmission<sup>62-65</sup>. However, their limitations became apparent when considering VOCs,  
344 virus-rich environments (e.g. hospitals) and prolonged residence in poorly ventilated areas (like NVV),  
345 as confirmed by this study and previous research<sup>30,44,64,66</sup>. This highlights the need for a combination of  
346 preventive measures. Since the risk of infection increases significantly with the duration of the event<sup>48</sup>,

347 it is recommended to limit the residence time in epidemic settings to a necessary minimum or to  
348 consider short breaks<sup>67</sup>. Reducing the number of spectators is also an effective mitigation  
349 measure<sup>25,68</sup>. However, experimental and numerical measurements showed a heterogeneous impact  
350 of the occupancy rate for the venues with mixing ventilation, similarly to the moderate effects of recent  
351 studies<sup>36,68</sup>. For DVV1, the checkerboard seating arrangement resulted in a ~3-fold reduction in the  
352 total risk of infection, clearly indicating an additional downsizing effect beyond the effect of reduced  
353 audience size as shown recently<sup>16</sup>.

354 A reduction in the airflow rate at DVV1 was associated with an up to ~10-fold increase in the risk of  
355 airborne transmission, reaching almost 100% of spectators above  $R_{acc}$ , supported by a study by Moritz  
356 et al.<sup>6</sup>. This showed that the effectiveness of DV is dependent on a room-appropriate and well-  
357 adjusted mode of operation as previously demonstrated<sup>19</sup>. This is further demonstrated by DVV2,  
358 where a silent passive emitter in the mechanically ventilated stalls resulted in exposure to spectators  
359 in the distant unventilated balconies, albeit small, but significantly increased when a high emission  
360 scenario was considered, highlighting the need for good ventilation in all areas of the room. Similarly,  
361 Adzic et al.<sup>26</sup> found higher levels of CO<sub>2</sub>, a good proxy for potentially infectious respiratory aerosols<sup>28</sup>,  
362 in non-ventilated, but also in ventilated balconies. However, discussions with several stagehands  
363 revealed a gap in knowledge about the correct operation and adjustment of the mechanical ventilation  
364 system in place and its benefits in reducing airborne disease transmission, resulting in low to  
365 moderate airflow rates or partial shutdowns, as also recently discussed<sup>69</sup>. In addition, during the  
366 COVID-19 pandemic many venues were operated with 100% outdoor air and with maximum  
367 ventilation rates, resulting in high energy consumption and operating costs<sup>26</sup>. Furthermore, it should be  
368 emphasised that increasing the flow rate does not necessarily reduce the risk of infection and that  
369 close proximity exposure is still likely<sup>46,70-72</sup>. Therefore, ventilation modes and rates need to be  
370 optimised to balance the propagation risk reduction with operating system costs.

371 In summary, ventilation-type specific recommendations for 1, 2 and 3 h events are given in Table  
372 3a+b, considering R well below one. In the case of displacement ventilation case DVV1, the use of  
373 surgical masks or a reduction in occupancy is only recommended for events lasting longer than 3h,  
374 when Omicron is considered. For MVV1, recommendations for the use of face coverings are given for  
375 events of increasing duration, regardless of the infectivity of the virus variant. Reducing the crowding  
376 index was not a reliable mitigation measure (Fig. S6). As surgical face masks were sufficient for the  
377 wild-type variant, FFP2 masks were suggested for Omicron. The difficulty in predicting the risk of  
378 airborne transmission in naturally ventilated venues and the observed high risk of infection justify a  
379 general recommendation for FFP2 masks. However, this may not be sufficient for prolonged exposure,  
380 particularly to virus variants with increased infectivity, and temporary closure of the naturally ventilated  
381 venues should be considered.

382

383

384

385

386 **Table 3: Risk potential and recommendations of risk reduction strategies for venues with different**  
 387 **ventilation concepts**

388 (a) The mean values of the venue-specific  $R_{CFD}$  values of different emitter positions were calculated  
 389 for various parameters and mitigation strategies considering the SARS-CoV-2 wild-type and Omicron  
 390 variant. The total risk of infection coincides with the number of new COVID-19 infections and refers to  
 391 as secondary infections. In order to keep the threshold for epidemic control  $R < 1$ ,  $R_{CFD}$  values were  
 392 coloured according to their risk potential:  $R \geq 1$  red,  $R = 0.5$  yellow,  $R = 0$  green. The values between  
 393 the thresholds are coloured in shades of yellow-orange-red and yellow-green. The pre-pandemic  
 394 settings with a silent, passive emitter were as follows: no face cover, duration of 2h and full  
 395 occupancy. (b) Recommendations were given for the conduct of safe events, ensuring  $R < 0.5$  for one  
 396 to three hour events, considering the SARS-CoV2 wild-type and the Omicron variant for three  
 397 ventilation concepts. For example, during 3h events in a venue with displacement ventilation and a  
 398 predominant Omicron variant, an  $R < 0.5$  was achieved by using surgical face masks.

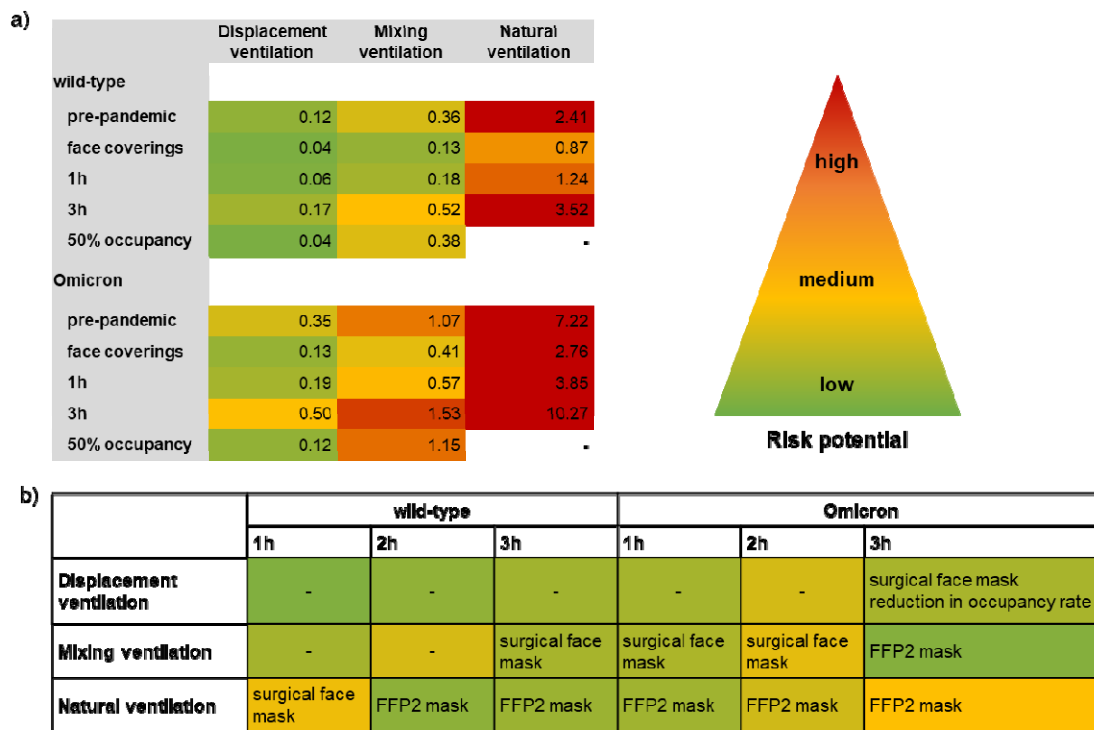

399

400 The special case of an infectious actor showed that an background actor (silent, passive), posed only  
 401 a low risk of airborne transmission, which increased significantly when ventilation was halved and the  
 402 actor became a high emitter with up to ~9.7 secondary infections, shifting the actor's emitter position  
 403 from low risk to the highest risk position with super-spreading potential. In addition, the more realistic  
 404 scenario of an actor with increased activity, such as singing and shouting, dramatically increased the  
 405 risk of airborne transmission by 27 times compared to a silent infectious background actor, revealing  
 406 its threat potential. The risk of infection from actors or singers should be more focused in future in  
 407 order to minimise the risk to the audience, but also to the ensemble, especially as the stage is often  
 408 not connected to the ventilation system.

409 Comparison of the three approaches revealed a good prediction of the overall airborne infection risk  
 410 by the analytical approach for the mixing ventilation case, indicated by the similarity with numerically  
 411 and experimentally derived values as shown recently<sup>73-74</sup>. For venues with displacement or natural  
 412 ventilation, however, the modified Wells-Riley approach over- or underestimated the airborne  
 413 transmission risk, demonstrating that the strong spatio-temporal dependence of the infection risk could



414 not be captured. The differences between the experimental and the numerical approach are probably  
415 due to the random positioning of seven absorbers, while the CFD analysis covers the entire audience.  
416 The absorber-specific aerosol concentrations vary strongly depending on their position to the emitter,  
417 making it difficult to select a representative set of absorber positions covering the full range of low and  
418 high-risk sites. Thus, the calculated venue-representative mean of experimental airborne transmission  
419 risk could be biased.

420 There are some limitations of the study. As ATMoS covered only a few positions at the venues  
421 studied, a bias in the experimental results could not be excluded. Validity and reliability of the  
422 experimental data could be improved by using more absorbers and by repeated measurements.  
423 Furthermore, an event-related R-value threshold of 1 is too high, as an infectious person has  
424 additional contacts during the infectious period that must be included to estimate epidemic growth.  
425 Concerning the CFD simulations, the assumption of a steady state within the venues is arguable,  
426 although the duration of the events is on the order of a few hours. It is likely that during the event the  
427 local concentration would increase and converge to the steady state value, which is implied for the risk  
428 assessment during the complete event. This shortcoming could be resolved by the unsteady  
429 integration of the time-dependent, experienced doses on a stationary flow field or with a fully unsteady  
430 simulation approach. Due to the large time frame and the comparatively high temporal resolution, the  
431 latter approach would involve rather prohibitively high numerical resources for the given larger venues.  
432 Concerning the former approach, numerical experiments were conducted for particular cases, which  
433 showed that values close to the steady state concentration were reached within a few minutes for the  
434 high-risk regions. Therefore, an additional benefit could not be expected from time-dependent  
435 integration results. Additionally, the assumption of constant thermal boundary conditions in a densely  
436 occupied event location is critical. The complete knowledge of all environmental boundary conditions  
437 and heat load reservoirs would certainly improve the accuracy of the numerical solution. Possibly, the  
438 effect would even outweigh the assumption of steady state concentrations. In a similar way, event-  
439 specific, relevant boundary conditions (e.g., half-opened doors, reduced ventilation, intensified  
440 lighting) had to be disregarded, since they partly depend on personal decision of the responsible  
441 technical staff or on the spectator's behaviour.

442 Furthermore, the risk models clearly depend on the precise estimation of shed quanta doses and its  
443 probability distribution. Due to the lack of a single log-normal distribution which fulfils all given  
444 requirements, tests have been conducted where  $\mu$  was kept constant and  $\sigma$  varied to fit the lower or  
445 upper bounds. The effect on the resulting risk was negligible, especially, when compared to the risk  
446 differences imposed by a high emitter. However, here again the precise amount of shed quanta, i.e.,  
447 the chosen quantile of the assumed distribution, is particularly important. On the other hand, this last  
448 limitation does not restrict the findings of this study, which result from the comparison of different  
449 cases given the same assumed distribution. It rather illustrates the case dependency of super-  
450 spreading events.

## 451 **Conclusion**

452 Overall, the analytical approach proved to be suitable for the risk assessment of venues with mixing  
453 ventilation, although the observed sensitivity to boundary conditions limited its use, even for



454 investigating the effects of different parameters and mitigation strategies. However, to cover various  
455 ventilation concepts, and to identify venue-specific high-risk sites and areas of poor air circulation, an  
456 individual infection risk assessment through experimental and numerical approaches is required. The  
457 results of the study highlighted the wide range of individual infection risks. Low-, medium- and high-  
458 risk sites varied according to the ventilation strategy, the emitter position and the emission mode. All  
459 three ventilation strategies studied showed high-risk positions in the near field of the emitter, but  
460 further distribution in space was different, as shown recently<sup>11,16,25</sup>. At all venues, high-risk positions  
461 were also observed well beyond the physical distance guidelines. Venues with displacement  
462 ventilation had the lowest overall risk of infection and number of secondary cases with an  $R_{CFD}$  value  
463 well below one, even when the Omicron variant was considered. The observed directional aerosol  
464 distribution allowed prediction of highly exposed positions and the expected number of secondary  
465 cases per event. However, in unventilated areas, aerosols can accumulate and locally increase the  
466 risk of infection. In venues with mixing or natural ventilation, predicting highly exposed positions is  
467 difficult due to the influence of boundary conditions and room parameters (air inlets and outlets,  
468 windows, room height, volume) on the room airflow. Face masks provide the best protection against  
469 aerosol transmission, but should be combined with other mitigation measures in high risk areas. In  
470 terms of pandemic preparedness, the connection of the stage area to the ventilation system should be  
471 enforced, as well as raising the awareness of stage technicians and directors of the benefits of a well-  
472 adjusted ventilation system in reducing the transmission risk. However, the airflow rate should be  
473 balanced between the maximum acceptable individual risk of infection and economically acceptable  
474 operating costs.

## 475 **Materials and Methods**

### 476 **Study design**

477 The airborne transmission risk potential of venues with different room characteristics and ventilation  
478 concepts was examined using three approaches: experimental measurements using the Aerosol  
479 Transmission Measurement System (ATMoS), Computational Fluid Dynamics (CFD) analyses and the  
480 analytical Wells-Riley model (Fig. S1). In all three approaches, one infectious person (emitter) was  
481 placed in a fully occupied audience. As recent studies have confirmed the presence of people with  
482 high viral loads, so-called high emitters<sup>58,61,75,76</sup>, two emission profiles were considered: (I) a  
483 sedentary, passive emitter with an average viral load and (II) a slightly active emitter with a high viral  
484 load at the 90<sup>th</sup> percentile. The experimentally and numerically derived absorbed aerosol or quanta  
485 concentrations were used to calculate the individual (P) and total risk of infection (R), an analogue of  
486 the event reproduction number and an estimate of the effect of a single infectious occupant at an  
487 event<sup>69,77</sup>. R also represents the number of secondary infections caused by an infectious individual at  
488 an event<sup>78</sup>. Analogous to the basic reproduction number  $R_0$ , an estimate of the virus transmissibility, R  
489 should be kept at  $< 1$  to control disease transmission and epidemic growth<sup>79</sup>. Additionally, special  
490 cases were considered by all three approaches: (I) a venue combining displacement ventilation and  
491 natural ventilation (DVV2), (II) an infectious actor and (III) varying boundary conditions including  
492 reduced airflow rate and checkerboard pattern seating. Furthermore, the effects of mitigation  
493 measures, virus variants and varying boundary conditions such as the use of face coverings,

494 residence time, airflow rate and occupancy on the risk of infection were investigated using CFD  
495 results. The study design is shown schematically in Fig. S1.

## 496 Venues

497 To cover commonly installed ventilation systems, venues with displacement ventilation (DVV), mixing  
498 ventilation (MVB) and natural ventilation (NVV) were selected. All of the venues studied are theatres  
499 with a classic auditorium layout with ascending rows of seat, ranging from 99 to 470. Information on  
500 room characteristics and positions of air inlets and outlets are shown in Table S1 and Fig. S2.

## 501 Experimental Measurements

502 The experimental measurements were carried out with ATMoS and were performed as previously  
503 described<sup>41-42</sup>. In brief, ATMoS consists of an emitter that continuously releases a 10%-NaCl-water  
504 solution into the environment with a mass flow of 0.43 g/min and an aerosol mean diameter of 2.4  $\mu\text{m}$   
505 with a standard deviation of 1.1  $\mu\text{m}$ . After evaporation, the virus-sized NaCl nuclei remain in the air  
506 and follow the room airflow, thus serving as an ideal virus surrogate. Seven absorbers were distributed  
507 in the room, which inhaled the released aerosols at a flow rate of 10 l/min. The absorbed particles  
508 were dissolved in ultrapure water and were quantified by conductivity measurement over time. The  
509 experimental setup was as follows: 10 min lead-in time to measure the background concentration at  
510 each location (no aerosol emission), 27-60 min aerosol emission (Table S1) and 10 min lead-out time  
511 (no aerosol emission). For the determination of aerosol emission during regular events, the  
512 measurement duration was adapted to event-specific processes, such as the timing of half-times,  
513 resulting in different measurement periods. To simulate the influence of body-generated buoyancy  
514 effects on aerosol distribution and airflow characteristics, up to 100 heat sources were distributed  
515 throughout the venue mimicking a human heat emission of 80 W. In venues with more than 100 seats,  
516 experimental measurements were carried out during regular events with spectators and heat sources.

### 517 Calculation of the experimental risk of infection ( $R_{ATMoS}$ )

518 Using the inhaled mass of NaCl, the absorber-specific inhaled quanta  $D_q$  dose was calculated<sup>39</sup>:

$$D_q = \int_0^t \dot{q}_{in}(t) dt = \frac{\dot{q}_{out}}{\dot{m}_{out\ sp}} \int_0^t \dot{m}_{in\ sp}(t) dt \quad (1)$$

519 with  $\dot{q}_{in}$ ,  $\dot{q}_{out}$ ,  $\dot{m}_{out\ sp}$ ,  $\dot{m}_{in\ sp}$ ,  $t$  as quanta input and output rate, mass flow for NaCl output and  
520 input and time. According to the Wells-Riley approach, the experimental individual infection risk via  
521 aerosols  $P_{ATMoS}$  was calculated for each absorber as<sup>80</sup>:

$$P_{ATMoS} = 1 - e^{-D_q} \quad (2)$$

522 A quanta emission rate of 18.6 quanta  $\text{h}^{-1}$  was assumed for a sedentary, passive emitter (medium  
523 emitter scenario) and 264.68 quanta  $\text{h}^{-1}$  for a high emitter (high emitter scenario)<sup>30,78</sup>. The distribution  
524 of the infection probabilities from the experimental measurements was presented in box plots with  
525 median, 0.25 and 0.75 quartile and with minimum and maximum values outside the box. To calculate

526 the venue-specific total infection risk  $R_{ATMOS}$ , the mean of the seven absorber-specific  $P_{ATMOS}$  was  
527 calculated and multiplied by the maximum number of occupants ( $N$ ) per venue as:

$$R_{ATMOS} = P_{ATMOS} N \quad (3)$$

## 528 **Computational Fluid Dynamics (CFD)**

529 The presented CFD study includes four venues of particular interest: one displacement ventilation  
530 case (DVV1), one multi-purpose mixing ventilation venue (MVV1) and one ascending stage case with  
531 nonspecific ventilation concept (natural ventilation, NVV). Furthermore, a special case of displacement  
532 ventilation with ventilated stalls and two not-mechanically ventilated balconies (DVV2) was  
533 investigated. Numerical analyses were conducted for varying boundary conditions such as occupancy  
534 (full vs checkerboard) for DVV1 and MVV1, airflow rates (100% vs. 50%) for DVV1 and emitter  
535 positions for DVV1, DVV2, MVV1 and NVV. Using the software Simcenter™ STAR-CCM+  
536 (SIMCENTER), steady state simulations on unstructured finite volume grids are conducted after  
537 simplified but detailed reconstruction of the geometric features and boundary conditions based on  
538 construction plans, interviews with the responsible technical staff and inspection of the conditions on-  
539 site including measurements of the thermal conditions, e.g. temperatures of the environment, the  
540 supply air and the surroundings. Flow and energy transport are solved in a segregated manner using  
541 the SIMPLE algorithm and the segregated fluid temperature model. Turbulence is modelled by the  
542 Realizable k- $\epsilon$ -Modell in a Two-Layer formulation (Wolfstein). Room air is assumed to be a single  
543 component ideal gas under the influence of gravity. Considering the substantial heat fluxes of lighting,  
544 electrical devices and occupants, grey thermal surface-to-surface radiation is applied under usage of  
545 view factors. Computer simulated persons (CSP) depict simplified, seated occupants, where the  
546 mouth area is specifically distinguished for the insertion of breath tracer gases. CSP are assumed to  
547 emit a heat flux of 80 W. Each pre-selected emitter releases a personalized passive scalar with a  
548 fictitious, momentum-free mass flux through the mouth area surface cells, which is thereafter  
549 transported by convection and diffusion. The passive scalar values throughout the venue's volume can  
550 be referred to their respective source flux and thus local, non-interacting concentrations are obtained  
551 within each cell for each emitter. For each CSP a hemisphere of radius 0.23 m (Hemisphere) around  
552 the mouth normal vector is defined which acts as a volume-averaged sampling zone assigned to the  
553 respective absorbing CSP. The averaged values approximately represent the locally experienced,  
554 relative amounts of aerosols shed by the different emitters. These values, along with additional  
555 information for further analysis and normalization, are exported and subsequently evaluated in tailored  
556 Python scripts. This approach also allows for an a posteriori assignation of the typically uncertain  
557 quanta emission rate.

558 Base sizes of the grid range from 0.1 m to 0.3 m, depending on the size of the venue. Typically, cell  
559 sizes are much smaller and rather on the order of a few centimetres in the proximity of CSP,  
560 furnishings or equipment. Local refinements, especially on heat or passive scalar emitting surfaces like  
561 the CSP, are on the order of millimetres and prism layer cells (4 to 6 layers regularly) support the near-  
562 wall solution. Overall mesh sizes range from 3.5 million to 34 million cells. Solution of the flow  
563 variables is performed first, while the passive scalar transport equations are solved on the frozen flow

564 field afterwards. Convergence is assumed on the basis of a relative residual drop of at least three  
565 orders while simultaneously ensuring constant and physically reasonable monitor values for relevant  
566 integral values of the solver variables, e.g., temperature or passive scalar fluxes.

#### 567 *Calculation of the numerical risk of infection ( $R_{CFD}$ )*

568 To the present day, there is still uncertainty concerning the quanta emission rate of SARS-CoV-2  
569 aerosols. Peng et al. (2022) established an approximately log-normally distributed emission rate with a  
570 mean of 18.6 quanta  $h^{-1}$  for a sedentary, passive emitter of the wild-type variant, where the 5th and  
571 95th percentile are located at 8.4 and 48.1 quanta  $h^{-1}$ , respectively. Buonanno et al.<sup>78</sup> specify  
572 comparable log-normally distributed emission rates for different activity and vocalization levels.  
573 Between the two studies the deviations in reported mean values and standard deviations are partially  
574 balanced by enhancement factors to compensate for case differentiation. To the authors' knowledge,  
575 there is no log-normal distribution which fulfils all three requirements stated above for the mean and  
576 the two given percentiles. Moreover, non-passive behaviour, e.g. (quiet) speaking, is not incorporated  
577 in the distribution of Peng et al. (2022). Since the emission profile of occupants is subject to personal  
578 variations and behaviour, we assume a combined log-normal distribution with mean value of 18.6  
579 quanta  $h^{-1}$  and standard deviation of  $\sigma = 0.720 * \ln(10) \approx 1.65786$ , where the latter is as suggested by  
580 Buonanno et al.<sup>78</sup>. Thus, the distribution to fulfil these conditions is given by  $LN(\mu, \sigma^2)$  where the  
581 desired normal mean is given by  $\mu = 0.672683 * \ln(10) \approx 1.54891$ .

582 500.000 pseudo-random number realizations of this distribution have been computed to account for  
583 the variability of the quanta emission rate while the mean value of 18.6 quanta  $h^{-1}$  was verified.  
584 Subsequently, for all realizations and all venues the corresponding quanta doses were calculated  
585 based on the locally experienced volume-averaged values within the CSP hemispheres and the event  
586 duration according to equation (1) (i.e., steady-state absorption is assumed). By applying equation (2)  
587 the local risk  $P_{CFD}$  with respect to a given emission rate is evaluated. In a last step, the average of all  
588 realizations within a particular venue is calculated as  $R_{CFD}$ , creating a mapping of the mean, local  
589 infection risks with regard to the given emission rate distribution. For further analysis, high emission  
590 cases without variation (264.68 quanta  $h^{-1}$ ) are covered. Furthermore, an individual acceptable risk of  
591 infection  $R_{acc}$  was determined for numerically derived infection risks and set at  $10^{-2}$  in accordance with  
592 recent studies<sup>78,81-82</sup> as the acceptable level of the COVID-19 risk of infection is still unknown. When  
593 planning future events, the individual infection risk must be less than  $R_{acc}$  to keep the risk of infection  
594 to spectators manageable. This enabled the identification of high-risk areas and risk management at  
595 the venues studied.

596 Furthermore, a risk analysis was conducted, considering the effect of mitigation measures, virus  
597 variants and varying boundary conditions. In detail, cases with different mask efficiencies (surgical  
598 mask: 65%, FFP2 mask: 99.96%), SARS-CoV-2 virus variants (Alpha, Delta and Omicron with  
599 enhancement factors as in Table S2) as well as variations of duration (1, 2 and 3 h) and vocalization  
600 were compared by taking into account the multipliers of the quanta absorption (see Table S2).

#### 601 **Modified Wells-Riley approach**

602 The analytical Wells-Riley approach<sup>80,83</sup> was applied to each venue with modifications<sup>30</sup> to prove its  
603 applicability for a venue-specific infection risk assessment.

604 *Calculation of the analytical risk of infection ( $R_{analyt}$ )*

605 For classification of venues in terms of their potential airborne infection risk, the risk parameter  $H$  was  
606 introduced by Peng et al.<sup>30</sup>. To account for the effectiveness of air distribution of the different  
607 ventilation systems and to improve the imperfect well-mixed assumption of the analytical model, the  
608 parameter ventilation effectiveness ( $E_z$ ) was introduced into the equation of Peng et al.<sup>30</sup>, similar to an  
609 approach of Sun & Zhai<sup>68</sup>, by multiplying the air exchange rate (AER)  $\lambda$  by  $E_z$ :

$$H = \frac{r_{ss} r_E r_B f_e f_i D N_{sus}}{V (\lambda E_z)} \quad (4)$$

610 where  $r_{ss}$  is the correction factor for the deviation of average quanta concentration from that of steady  
611 state, e.g., for events too short to approximately reach steady state,  $r_E$  is the activity-related shedding  
612 rate enhancement factor,  $r_B$  is the activity-related breathing rate enhancement factor,  $f_e$  and  $f_i$  are the  
613 exhalation and inhalation penetration efficiency for face covering,  $D$  is the duration of the event,  $N_{sus}$  is  
614 the number of susceptible persons and  $V$  is the indoor environment volume. Ventilation-specific values  
615 for  $E_z$  can be found in the ASHRAE Standard 62.1<sup>15</sup> and are listed in Table S1 for the venues studied.  
616 In considering the worst-case scenario, virus decay and the deposition rate of virus-containing  
617 particles in the air were assumed to be low and therefore neglected. The analytically derived total risk  
618 of infection ( $R_{analyt}$ ) was calculated with parameter-specific values analogous to Peng et al. (2022)  
619 shown in Table S2:

$$R_{analyt} = E_{p0} B_0 I H \quad (5)$$

620 with  $E_{p0}$  the SARS-CoV-2 exhalation rate of an resting and only breathing infector,  $B_0$  the breathing  
621 rate of a resting susceptible person and the  $I$  the number of infectors present. The breathing rate was  
622 set to 0.49 m<sup>3</sup>/h. The basic configuration represents a typical pre-pandemic event in different venues  
623 with the presence of one infectious person and was defined as follows:

- 624 • duration of the event: 2h
- 625 • occupancy: 100%
- 626 • activity level: sedentary, passive
- 627 • SARS-CoV2 variant: wild-type
- 628 • no face coverings

629 For surgical masks, a penetration efficiency of 0.35 (65%) was assumed, i.e. 35% of exhaled particles  
630 still pass through the mask when both infectious (mask exhalation efficiency 50% (0.5)) and  
631 susceptible persons (mask inhalation efficiency 30% (0.7)) wear a mask. A filtration efficiency of  
632 99.96% (0.04) was assumed for a well-fitting FFP2 mask.

## 633 **References**

- 634 1. WHO. Coronavirus Disease (COVID-19): How Is It Transmitted? [https://www.who.int/news-](https://www.who.int/news-room/questions-and-answers/item/coronavirus-disease-covid-19-how-is-it-transmitted)  
635 [room/questions-and-answers/item/coronavirus-disease-covid-19-how-is-it-transmitted](https://www.who.int/news-room/questions-and-answers/item/coronavirus-disease-covid-19-how-is-it-transmitted). (2021)

- 636 2. CDC, Centers for Disease Control and Prevention. Scientific Brief: SARS-CoV-2 Transmission.  
637 <https://www.cdc.gov/coronavirus/2019-ncov/science/science-briefs/sars-cov-2-transmission.html>  
638 (2021).
- 639 3. Nader, I. W., Zeilinger, E. L., Jomar, D., & Zauchner, C. Onset of effects of non-pharmaceutical  
640 interventions on COVID-19 infection rates in 176 countries. *BMC Public Health*. **21**, 1472 (2021).
- 641 4. Majra, D., Benson, J., Pitts, J., & Stebbing, J. SARS-CoV-2 (COVID-19) superspreader events. *J.*  
642 *Infect*. **82**, 36–40 (2021).
- 643 5. Miller, S. L., Nazaroff, W. W., Jimenez, J. L., Boerstra, A., Buonanno, G., Dancer, S. J., Kurnitski,  
644 J., Marr, L. C., Morawska, L. & Noakes, C. Transmission of SARS-CoV-2 by inhalation of  
645 respiratory aerosol in the Skagit Valley Chorale superspreading event. *Indoor Air*. **31**, 314–323  
646 (2021).
- 647 6. Moritz, S., Gottschick, C., Horn, J., Popp, M., Langer, S., Klee, B., Purschke, O., Gekle, M., Ihling,  
648 A., Zimmermann, F. D. L., & Mikolajczyk, R. The risk of indoor sports and culture events for the  
649 transmission of COVID-19. *Nat. Commun*. **12**, 5096 (2021).
- 650 7. Llibre, J. M., Videla, S., Clotet, B., & Revollo, B. Screening for SARS-CoV-2 antigen before a live  
651 indoor music concert: an observational study. *Ann. Intern. Med*. **174**, 1487–1488 (2021).
- 652 8. Revollo, B., Blanco, I., Soler, P., Toro, J., Izquierdo-Useros, N., Puig, J., Puig, X., Navarro-Pérez,  
653 V., Casañ, C., Ruiz, L., Perez-Zsolt, D., Videla, S., Clotet, B. & Llibre, J. M. Same-day SARS-CoV-  
654 2 antigen test screening in an indoor mass-gathering live music event: a randomised controlled  
655 trial. *Lancet Infect. Dis*. **21**, 1365–1372 (2021).
- 656 9. Delaugerre, C., Foissac, F., Abdoul, H., Masson, G., Choupeaux, L., Dufour, E., Gastli, N.,  
657 Delarue, S. M., Néré, M. L., Minier, M., Gabassi, A., Salmona, M., Seguineau, M., Schmitt, S.,  
658 Tonglet, S., Olivier, A., Poyart, C., Le Goff, J., Lescure, X., Kernéis, S. & Tréluyer, J.-M.  
659 Prevention of SARS-CoV-2 transmission during a large, live, indoor gathering (SPRING): a non-  
660 inferiority, randomised, controlled trial. *Lancet Infect. Dis*. **22**, 341–348 (2022).
- 661 10. Lipinski, T., Ahmad, D., Serey, N., & Jouhara, H. Review of ventilation strategies to reduce the risk  
662 of disease transmission in high occupancy buildings. *Int. J. Thermofluids*, **7–8**, 100045 (2020).
- 663 11. Motamedi, H., Shirzadi, M., Tominaga, Y., & Mirzaei, P. A. CFD modeling of airborne pathogen  
664 transmission of COVID-19 in confined spaces under different ventilation strategies. *Sustain. Cities*  
665 *Soc.*, **76**, 103397 (2022).
- 666 12. Atkinson, J., Chartier, Y., Pessoa-Silva, CL, Jensen, P., Li, Y. & Seto, WH. Natural Ventilation for  
667 infection control in health-care settings. Ch. 2, Concepts and types of ventilation (World Health  
668 Organization, Geneva, 2009).
- 669 13. He, Q., Niu, J., Gao, N., Zhu, T., & Wu, J. CFD study of exhaled droplet transmission between  
670 occupants under different ventilation strategies in a typical office room. *Build Environ*. **46**, 397–408  
671 (2011).
- 672 14. Ahn, H., Rim, D., & Lo, L. J. Ventilation and energy performance of partitioned indoor spaces  
673 under mixing and displacement ventilation. *Build Simul*. **11**, 561–574 (2018).
- 674 15. Ashrae. *ANSI/ASHRAE Standard 62.1-2022 Ventilation and Acceptable Indoor Air Quality*. p.22  
675 (Atlanta, 2022)
- 676 16. Lichtner, E., & Kriegel, M. Pathogen spread and air quality indoors - ventilation effectiveness in a  
677 classroom. Preprint at: [Pathogen spread and air quality indoors - ventilation effectiveness in a](#)  
678 [classroom \(tu-berlin.de\)](#) (2021).



- 679 17. Liu, S., Koupriyanov, M., Paskaruk, D., Fediuk, G., & Chen, Q. Investigation of airborne particle  
680 exposure in an office with mixing and displacement ventilation. *Sustain. Cities Soc.* **79**, 103718  
681 (2022).
- 682 18. Qian, H., Li, Y., Nielsen, P. V., Hyltdgaard, C. E., Wong, T. W., & Chwang, A. T. Y. Dispersion of  
683 exhaled droplet nuclei in a two-bed hospital ward with three different ventilation systems. *Indoor*  
684 *Air.* **16**, 111–128 (2006).
- 685 19. Pei, G., Taylor, M., & Rim, D. (2021). Human exposure to respiratory aerosols in a ventilated  
686 room: Effects of ventilation condition, emission mode, and social distancing. *Sustain. Cities Soc.*  
687 **73**, 103090.
- 688 20. Bhagat, R. K., Wykes, M. S. D., Dalziel, S. B., & Linden, P. F. Effects of ventilation on the indoor  
689 spread of COVID-19. *J. Fluid Mech.* **903**, F1 (2020).
- 690 21. Kavagic, M., Mumovic, D., Stevanovic, Z., & Young, A. Analysis of thermal comfort and indoor air  
691 quality in a mechanically ventilated theatre. *Energy Build.* **40**, 1334–1343 (2008).
- 692 22. Cheng, Yuanda, Niu, J., & Gao, N. Stratified air distribution systems in a large lecture theatre: A  
693 numerical method to optimize thermal comfort and maximize energy saving. *Energy Build.* **55**,  
694 515–525 (2012).
- 695 23. Kim, G., Schaefer, L., Lim, T. S., & Kim, J. T. Thermal comfort prediction of an underfloor air  
696 distribution system in a large indoor environment. *Energy Build.* **64**, 323–331 (2013).
- 697 24. Payet, M., David, M., Gandemer, J., & Garde, F. Performance evaluation and post-occupancy  
698 evaluation of a naturally ventilated lecture theatre in Reunion Island. *J. Phys: Conference Series*,  
699 **1343**, 012189 (2019).
- 700 25. Wang, Y., & Nam-gyu, C. Research on performance layout and management optimization of  
701 Grand Theatre based on green energy saving and emission reduction technology. *Energy Rep.* **8**,  
702 1159–1171 (2022).
- 703 26. Adzic, F., Roberts, B. M., Hathway, E. A., Matharu, R. K., Ciric, L., Wild, O., Cook, M. & Malki-  
704 Epshtein, L. A post-occupancy study of ventilation effectiveness from high-resolution CO2  
705 monitoring at live theatre events to mitigate airborne transmission of SARS-CoV-2. *Build Environ.*  
706 **223**, 109392 (2022).
- 707 27. Malki-Epshtein, L., Adzic, F., Roberts, B. M., Hathway, E. A., Iddon, C., Mustafa, M., Cook, M.  
708 Measurement and rapid assessment of indoor air quality at mass gathering events to assess  
709 ventilation performance and reduce aerosol transmission of SARS-CoV-2. *Build Serv Eng Res*  
710 *Technol.* **44**, 113-133 (2022).
- 711 28. Kappelt, N., Russell, H. S., Kwiatkowski, S., Afshari, A., & Johnson, M. S. Correlation of  
712 respiratory aerosols and metabolic carbon dioxide. *Sustainability.* **13**, 12203 (2021).
- 713 29. Kriegel, M., & Hartmann, A. Covid-19 contagion via aerosol particles comparative evaluation of  
714 indoor environments with respect to situational R-value. Preprint at: [https://depositonce.tu-](https://depositonce.tu-berlin.de/items/24ee5903-4f1c-4e61-8a8c-1e21e0103818)  
715 [berlin.de/items/24ee5903-4f1c-4e61-8a8c-1e21e0103818](https://depositonce.tu-berlin.de/items/24ee5903-4f1c-4e61-8a8c-1e21e0103818). (2021).
- 716 30. Peng, Z., Rojas, A. L. P., Kropff, E., Bahnfleth, W., Buonanno, G., Dancer, S. J., Kurnitski, J., Li,  
717 Y., Loomans, M. G. L. C., Marr, L. C., Morawska, L., Nazaroff, W., Noakes, C., Querol, X., Sekhar,  
718 C., Tellier, R., Greenhalgh, T., Bourouiba, L., Boerstra, A., Tang, J. W., Miller, S. L. & Jimenez, J.  
719 L. practical indicators for risk of airborne transmission in shared indoor environments and their  
720 application to covid-19 outbreaks. *Environ. Sci. Technol.* **56**, 1125–1137. (2022).



- 721 31. Schade, W., Reimer, V., Seipenbusch, M., Willer, U., Hübner, E. G. Viral aerosol transmission of  
722 SARS-CoV-2 from simulated human emission in a concert hall. *Int J Infect Dis.* **107**, 12-14 (2021).
- 723 32. Fraunhofer Institute for Building Physics IBP. The CineCov project studies the ventilation situation  
724 in movie theaters. *Cinemas: Good Ventilation Ensures Low Risk of Infection*,  
725 [https://www.ibp.fraunhofer.de/en/press-media/press-releases/pi\\_2021-12\\_cinemas-good-](https://www.ibp.fraunhofer.de/en/press-media/press-releases/pi_2021-12_cinemas-good-ventilation-ensures-low-risk-of-infection.html)  
726 [ventilation-ensures-low-risk-of-infection.html](https://www.ibp.fraunhofer.de/en/press-media/press-releases/pi_2021-12_cinemas-good-ventilation-ensures-low-risk-of-infection.html) (2021).
- 727 33. Sze To, G. N. & Chao, C. Y. Review and comparison between the Wells-Riley and dose-response  
728 approaches to risk assessment of infectious respiratory diseases. *Indoor Air.* **20**, 2-16 (2010).
- 729 34. Shao, S., Zhou, D., He, R., Li, J., Zou, S., Mallery, K., Kumar, S., Yang, S. & Hong, J. Risk  
730 assessment of airborne transmission of COVID-19 by asymptomatic individuals under different  
731 practical settings. *J. Aerosol Sci.* **151**, 105661 (2021).
- 732 35. Ho, C. K. Modeling airborne pathogen transport and transmission risks of SARS-CoV-2. *Appl.*  
733 *Math. Model.* **95**, 297–319 (2021).
- 734 36. Huang, J., Hao, T., Liu, X., Jones, P., Ou, C., Liang, W., & Liu, F. Airborne transmission of the  
735 Delta variant of SARS-CoV-2 in an auditorium. *Build. Environ.* **219**, 109212 (2022).
- 736 37. Tang, J. W., Noakes, C. J., Nielsen, P. V., Eames, I., Nicolle, A., Li, Y., & Settles, G. S. Observing  
737 and quantifying airflows in the infection control of aerosol- and airborne-transmitted diseases: an  
738 overview of approaches. *J. Hosp. Infect.* **77**, 213–222 (2011).
- 739 38. Izadyar, N., & Miller, W. Ventilation strategies and design impacts on indoor airborne transmission:  
740 A review. *Build. Environ.* **218**, 109158 (2022).
- 741 39. Siebler, L., Calandri, M., Rathje, T. & Stergiaropoulos, K. experimental methods of investigating  
742 airborne indoor virus-transmissions adapted to several ventilation measures. *Int. J. Environ. Res.*  
743 *Public Health.* **19**, 11300 (2022).
- 744 40. Oksanen, L., Auvinen, M., Kuula, J., Malmgren, R., Romantschuk, M., Hyvärinen, A., Laitinen, S.,  
745 Maunula, L., Sanmark, E., Geneid, A., Sofieva, S., Salokas, J., Veskiäli, H., Sironen, T.,  
746 Grönholm, T., Hellsten, A., & Atanasova, N. Combining Phi6 as a surrogate virus and  
747 computational large-eddy simulations to study airborne transmission of SARS-CoV-2 in a  
748 restaurant. *Indoor Air.* **32**, e13165 (2022).
- 749 41. Lommel, M., Froese, V., Sieber, M., Jentzsch, M., Bierewirtz, T., Hasirci, Ü., Rese, T., Seefeldt, J.,  
750 Schimek, S., Kertzscher, U., & Paschereit, C. O. Novel measurement system for respiratory  
751 aerosols and droplets in indoor environments. *Indoor air.* **31**, 1860–1873 (2021).
- 752 42. Schulz, I. & Hehnen, F., Lausch, K. H., Geisler, S. M., Hasirci, Ü., Wolff, S., Rese, T., Schimek, S.,  
753 Lommel, M., Paschereit, C. O., Moritz, S., Kriegel, M. & Kertzscher, U. experimental device to  
754 evaluate aerosol dispersion in venues. Preprint at (2023).
- 755 43. Makris, R., Lichtner, E., & Kriegel, M. Nahfeldexposition respiratorischer Partikel anhand  
756 statistischer Auswertung um eine emittierende Person im Innenraum. Preprint at:  
757 <https://depositonce.tu-berlin.de/items/363c2901-cb47-4f2e-98cb-f3cc17e316ef> (2021).
- 758 44. Lange, P., Westhoff, A., Kohl, A., & Müller, A. experimental study of the indoor aerosol-dynamics  
759 for a low-momentum ventilation system with an air purifier unit. Preprint at:  
760 [https://papers.ssrn.com/sol3/papers.cfm?abstract\\_id=4028479](https://papers.ssrn.com/sol3/papers.cfm?abstract_id=4028479) (2022).
- 761 45. Zhang, C., Nielsen, P. V., Liu, L., Sigmer, E. T., Mikkelsen, S. G., & Jensen, R. L. The source  
762 control effect of personal protection equipment and physical barrier on short-range airborne  
763 transmission. *Build. Environ.* **211**, 108751 (2022).

- 764 46. Villafruela, J. M., Olmedo, I., Berlanga, F. A., & de Adana, M. R. Assessment of displacement  
765 ventilation systems in airborne infection risk in hospital rooms. *PLOS ONE*, **14**, e0211390 (2019).
- 766 47. Su, W., Yang, B., Melikov, A., Liang, C., Lu, Y., Wang, F., Li, A., Lin, Z., Li, X., Cao, G. &  
767 Kosonen, R. Infection probability under different air distribution patterns. *Build. Environ.* **207**,  
768 108555 (2022).
- 769 48. Foster, A., & Kinzel, M. Estimating COVID-19 exposure in a classroom setting: A comparison  
770 between mathematical and numerical models. *Phys. Fluids*, **33**, 021904 (2021).
- 771 49. Zhao, W., Mustakallio, P., Lestinen, S., Kilpeläinen, S., Jokisalo, J. & Kosonen, R. Numerical and  
772 experimental study on the indoor climate in a classroom with mixing and displacement air  
773 distribution methods. *Buildings* **12**, 1314 (2022).
- 774 50. Kalmár, T., Szodrai, F. & Kalmár, F. Local ventilation effectiveness dependence on the airflow  
775 pattern and temperature in the case of isothermal balanced ventilation. *J. Build. Eng.* **61**, 105309  
776 (2022).
- 777 51. Shen, J., Nabutola, K., Birnkrant, M. J., McKinney, P. J., Dong, B., & Zhang, J. Estimation of  
778 infection risk through airborne transmission in large open spaces with different air distributions.  
779 *E3S Web of Conferences*, **356**, 05017 (2022).
- 780 52. Escombe, A. R., Oeser, C. C., Gilman, R. H., Navincopa, M., Ticona, E., Pan, W., Martínez, C.,  
781 Chacaltana, J., Rodríguez, R., Moore, D. A. J., Friedland, J. S. & Evans, C. A. Natural ventilation  
782 for the prevention of airborne contagion. *PLoS Med.* **4**, e68 (2007).
- 783 53. Qian, Hua, Li, Y., Seto, W. H., Ching, P., Ching, W. H., & Sun, H. Q. Natural ventilation for  
784 reducing airborne infection in hospitals. *Build. Environ.* **45**, 559–565 (2010).
- 785 54. Abdullah, H. K., & Alibaba, H. Z. Open-plan office design for improved natural ventilation and  
786 reduced mixed mode supplementary loads. *Indoor Built Environ.* **31**, 2145–2167 (2022).
- 787 55. Puhach, O., Adea, K., Hulo, N., Sattonnet, P., Genecand, C., Iten, A., Jacquérior, F., Kaiser, L.,  
788 Vetter, P., Eckerle, I. & Meyer, B. Infectious viral load in unvaccinated and vaccinated individuals  
789 infected with ancestral, Delta or Omicron SARS-CoV-2. *Nat. Med.* **28**, 1491–1500 (2022).
- 790 56. Mohsin, M., & Mahmud, S. Omicron SARS-CoV-2 variant of concern. *Medicine*. **101**, e29165  
791 (2022).
- 792 57. Barbosa, B. P. P., & de Carvalho Lobo Brum, N. Ventilation mode performance against airborne  
793 respiratory infections in small office spaces: limits and rational improvements for Covid-19. *J. Braz.*  
794 *Soc. Mech. Sci. Eng.* **43**, 316 (2021).
- 795 58. Asadi, S., Wexler, A. S., Cappa, C. D., Barreda, S., Bouvier, N. M., & Ristenpart, W. D. Aerosol  
796 emission and superemission during human speech increase with voice loudness. *Sci. Rep.*, **9**,  
797 2348 (2019).
- 798 59. Wang, J., Chen, X., Guo, Z., Zhao, S., Huang, Z., Zhuang, Z., Wong, E. L., Zee, B. C.-Y., Chong,  
799 M. K. C., Wang, M. h. & Yeoh, E. K. Superspreading and heterogeneity in transmission of SARS,  
800 MERS, and COVID-19: A systematic review. *Comput. Struct. Biotechnol. J.*, **19**, 5039–5046  
801 (2021).
- 802 60. Chen, P. Z., Bobrovitz, N., Premji, Z., Koopmans, M., Fisman, D. N., & Gu, F. X. Heterogeneity in  
803 transmissibility and shedding SARS-CoV-2 via droplets and aerosols. *eLife*. **10**, e65774 (2021).
- 804 61. Coleman, K. K., Tay, D. J. W., Tan, K. S., Ong, S. W. X., Than, T. S., Koh, M. H., Chin, Y. Q.,  
805 Nasir, H., Mak, T. M., Chu, J. J. H., Milton, D. K., Chow, V. T. L., Tambyah, P. A., Chen, M. &  
806 Tham, K. W. Viral load of Severe Acute Respiratory Syndrome Coronavirus 2 (SARS-CoV-2) in

- 807 respiratory aerosols emitted by patients with Coronavirus Disease 2019 (COVID-19) while  
808 breathing, talking, and singing. *Clin. Infect. Dis.* **74**, 1722–1728 (2022).
- 809 62. Chu, D. K., Akl, E. A., Duda, S., Solo, K., Yaacoub, S., Schünemann & Schünemann, H. J.  
810 Physical distancing, face masks, and eye protection to prevent person-to-person transmission of  
811 SARS-CoV-2 and COVID-19: a systematic review and meta-analysis. *Lancet*, **395**, 1973–1987  
812 (2020).
- 813 63. Asadi, S., Cappa, C. D., Barreda, S., Wexler, A. S., Bouvier, N. M., & Ristenpart, W. D. Efficacy of  
814 masks and face coverings in controlling outward aerosol particle emission from expiratory  
815 activities. *Sci. Rep.* **10**, 15665 (2020).
- 816 64. Cheng, Yafang, Ma, N., Witt, C., Rapp, S., Wild, P. S., Andreae, M. O., Pöschl, U. & Su, H. Face  
817 masks effectively limit the probability of SARS-CoV-2 transmission. *Science*, **372**, 1439–1443  
818 (2021).
- 819 65. Nazaroff, W. W. Indoor aerosol science aspects of SARS-CoV-2 transmission. *Indoor Air.* **32**,  
820 e12970 (2022).
- 821 66. Kriegel, M., Hartmann, A., Buchholz, U., Seifried, J., Baumgarte, S., & Gastmeier, P. SARS-CoV-2  
822 aerosol transmission indoors: a closer look at viral load, infectivity, the effectiveness of preventive  
823 measures and a simple approach for practical recommendations. *Int. J. Environ. Res. Public Health.* **19**, 220 (2021).  
824
- 825 67. Melikov, A. K., Ai, Z. T. & Markov, D. G. Intermittent occupancy combined with ventilation: An  
826 efficient strategy for the reduction of airborne transmission indoors. *Sci Total Environ.* **744**, 140908  
827 (2020).
- 828 68. Sun, C., & Zhai, Z. The efficacy of social distance and ventilation effectiveness in preventing  
829 COVID-19 transmission. *Sustain. Cities Soc.* **62**, 102390 (2020).
- 830 69. Morawska, L., Allen, J., Bahnfleth, W., Bluysen, P. M., Boerstra, A., Buonanno, G., Cao, J.,  
831 Dancer, S. J., Floto, A., Franchimon, F., Greenhalgh, T., Haworth, C., Hogeling, J., Isaxon, C.,  
832 Jimenez, J. L., Kurnitski, J., Li, Y., Loomans, M., Marks, G., Marr, L. C., Mazzarella, L., Melikov,  
833 A.K., Miller, S., Milton, D. K., Nazaroff, W. , Nielsen, P. V., Noakes, C., Peccia, J., Prather, K.,  
834 Querol, X., Sekhar, C., Seppänen, O., Tanabe, S.-I., Tang, J. W., Tellier, R., Tham, K. W.,  
835 Wargocki, P., Wierzbicka, A. & Yao, M. A paradigm shift to combat indoor respiratory infection.  
836 *Science*, **372**, 689–691 (2021).
- 837 70. Pantelic, J. & Tham, K. W. Adequacy of air change rate as the sole indicator of an air distribution  
838 system's effectiveness to mitigate airborne infectious disease transmission caused by a cough  
839 release in the room with overhead mixing ventilation: A case study, *HVAC&R Res.* **19**, 947-961  
840 (2013).
- 841 71. Adhikari, U., Chabrelie, A., Weir, M., Boehnke, K., McKenzie, E., Ikner, L., Wang, M., Wang, Q.,  
842 Young, K., Haas, C. N., Rose, J. & Mitchell, J. A case study evaluating the risk of infection from  
843 Middle Eastern Respiratory Syndrome Coronavirus (MERS-CoV) in a hospital setting through  
844 bioaerosols. *Risk Anal.* **39**, 2608–2624 (2019).
- 845 72. Yang, R., Ng, C. S., Chong, K. L., Verzicco, R., & Lohse, D. Do increased flow rates in  
846 displacement ventilation always lead to better results? *J. Fluid Mech.* **932**, A3 (2022).
- 847 73. Zhou, Y., & Ji, S. Experimental and numerical study on the transport of droplet aerosols generated  
848 by occupants in a fever clinic. *Build Environ.* **187**, 107402 (2021).

- 849 74. Lau, Z., Griffiths, I. M., English, A., & Kaouri, K. Predicting the spatio-temporal infection risk in  
850 indoor spaces using an efficient airborne transmission model. *Proc. Math. Phys. Eng. Sci.* **478**,  
851 20210383 (2022).
- 852 75. Alsved, M., Matamis, A., Bohlin, R., Richter, M., Bengtsson, P.-E., Fraenkel, C.-J., Medstrand, P.  
853 & Löndahl, J. Exhaled respiratory particles during singing and talking. *Aerosol Sci. Technol.*, **54**,  
854 1245–1248 (2020).
- 855 76. Mürbe, D., Kriegel, M., Lange, J., Rotheudt, H., & Fleischer, M. Aerosol emission in professional  
856 singing of classical music. *Sci. Rep.* **11**, 14861 (2021).
- 857 77. Tupper, P., Boury, H., Yerlanov, M., & Colijn, C. Event-specific interventions to minimize COVID-  
858 19 transmission. *Proc. Nat. Acad. Sci U.S.A.* **117**, 32038–32045 (2020).
- 859 78. Buonanno, G., Morawska, L., & Stabile, L. Quantitative assessment of the risk of airborne  
860 transmission of SARS-CoV-2 infection: prospective and retrospective applications. *Environ. Int.*  
861 **145**, 106112 (2020).
- 862 79. Leung, N. H. L. Transmissibility and transmission of respiratory viruses. *Nat. Rev. Microbiol.* **19**,  
863 528–545 (2021).
- 864 80. Riley, E. C., Murphy, G., & Riley, R. L. (1978). Airborne spread of measles in a suburban  
865 elementary school. *Am. J. Epidemiol.* **107**, 421–432 (1978).
- 866 81. Dai, H., & Zhao, B. Association of the infection probability of COVID-19 with ventilation rates in  
867 confined spaces. *Build. Simul.* **13**, 1321–1327 (2020).
- 868 82. Qiu, G., Spillmann, M., Tang, J., Zhao, Y., Tao, Y., Zhang, X., Geschwindner, H., Saleh, L., Zingg,  
869 W. & Wang, J. On-site quantification and infection risk assessment of airborne SARS-CoV-2 Virus  
870 via a nanoplasmonic bioaerosol sensing system in healthcare settings. *Adv. Sc.* **9**, 2204774  
871 (2022).
- 872 83. Wells, W. F. Airborne contagion and air hygiene: an ecological study of droplet infections. *JAMA*.  
873 **159**, 90 (1955).

## 874 **Acknowledgements**

875 We especially thank the venue managers, the stage technicians and the staff of the Puppet theatre  
876 Halle, the New Theatre Halle, Opera Halle, the Maxim-Gorki Theatre Berlin and Volksbühne Berlin for  
877 the opportunity to carry out the experimental measurements with ATMoS, for their support and for  
878 providing floor plans and technical drawings for CFD analyses. We would like to thank Ken J.  
879 Lindenberg and Anastasia Strigaleva for their assistance with the CFD analysis and Sophia Wolff and  
880 Katharina Schmidt for their assistance with the experimental measurements.

## 881 **Author contributions**

882 S.M.G.: conceptualization, methodology, formal analysis, investigation, resources, data curation,  
883 writing - original draft, writing - review and editing, supervision, visualization, funding acquisition  
884 K.H.L.: conceptualization, methodology, software, validation, formal analysis, investigation, resources,  
885 data curation, writing - original draft, writing - review and editing, visualization.  
886 F.H.: conceptualization, methodology, validation, formal analysis, investigation, resources, data  
887 curation, writing - review and editing, supervision.

888 I.S.: conceptualization, methodology, validation, formal analysis, investigation, resources, data  
889 curation, writing - review and editing.  
890 U.K.: conceptualization, methodology, resources, writing - review and editing, supervision.  
891 M.K.: conceptualization, methodology, resources, writing - review and editing, supervision.  
892 O.P.: conceptualization, methodology, resources, supervision, funding acquisition  
893 S.S.: conceptualization, methodology, investigation, resources, writing - review and editing.  
894 Ü.H.: conceptualization, methodology, formal analysis, investigation, resources.  
895 G.B.: methodology, software, formal analysis, investigation, resources, data curation.  
896 A.M.: conceptualization, supervision.  
897 K.S.: formal analysis, investigation.  
898 S.M.: conceptualization, methodology, investigation, resources, writing - review and editing,  
899 supervision, project administration, funding acquisition.

## 900 **Funding**

901 This work was supported by the Ministry of Science, Energy, Climate Protection and Environment of  
902 the Federal State of Saxony-Anhalt (grant number I 140), the Federal Government Commissioner for  
903 Culture and the Media (grant number 2521NSK115) and Berlin University Alliance (grant number  
904 SARS-CoV-2 Ausbreitung, Restart 2.0) as part of the RESTART 2.0 project.

## 905 **Competing Interests**

906 The authors declare no competing interests.

## 907 **Ethics Statement**

908 The Ethics Committee of the Martin Luther University (Halle, Germany) approved the aerosol  
909 measurement experiments with the ATMoS system during regular events with spectators.
